# Supplementary material
Source: MDPI journal article supplement (https://www.mdpi.com/1424-8247/15/3/263)
Supplement: s1 [file s1]

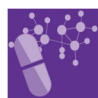

Review

# UV Filters: Challenges and Prospects

Ana Jesus <sup>1,2</sup>, Emília Sousa <sup>3,4</sup>, Maria T. Cruz <sup>5,6</sup>, Honorina Cidade <sup>3,4,\*</sup>, José M. Sousa Lobo <sup>1,2</sup> and Isabel F. Almeida <sup>1,2\*</sup>

<sup>1</sup> UCIBIO – Applied Molecular Biosciences Unit, MedTech, Laboratory of Pharmaceutical Technology, Department of Drug Sciences, Faculty of Pharmacy, University of Porto, 4050-313 Porto, Portugal. anaaimjesus@gmail.com (A.J.).

<sup>2</sup> Associate Laboratory i4HB - Institute for Health and Bioeconomy, Faculty of Pharmacy, University of Porto, 4050-313 Porto, Portugal

<sup>3</sup> Laboratory of Organic and Pharmaceutical Chemistry, Department of Chemical Sciences, Faculty of Pharmacy, University of Porto, 4050-313 Porto, Portugal; esousa@ff.up.pt (E.S.).

<sup>4</sup> CIIMAR–Interdisciplinary Centre of Marine and Environmental Research, Avenida General Norton de Matos, S/N, 4450-208 Matosinhos, Portugal

<sup>5</sup> Faculty of Pharmacy, University of Coimbra, 3004-531 Coimbra, Portugal; trosete@ff.uc.pt (M.T.R.).

<sup>6</sup> Center for Neuroscience and Cell Biology, 3004-504 Coimbra, Portugal.

\* Correspondence: hcidade@ff.up.pt (H.C.); ifalmeida@ff.up.pt (I.F.A.); Tel.: +351-220-428 (I.F.A.)

## Table of contents:

**Table S1.** List of UV filters approved for use in cosmetics products in EU in 2009 (actualized version in October 2021).

**Table S1.** List of UV filters approved for use in cosmetics products in EU in 2009 (actualized version in October 2021).

| Number                     | Chemical structure                                                                  | Chemical name <sup>a</sup>                                                                                                                                                                                | INCI name and Abbreviation <sup>b</sup>                                               | Maximum concentration allowed <sup>c</sup> | Characteristics <sup>a,c</sup> | Molecular weight (g/mol) <sup>a</sup> |
|----------------------------|-------------------------------------------------------------------------------------|-----------------------------------------------------------------------------------------------------------------------------------------------------------------------------------------------------------|---------------------------------------------------------------------------------------|--------------------------------------------|--------------------------------|---------------------------------------|
| <b>Organic UV Filters</b>  |                                                                                     |                                                                                                                                                                                                           |                                                                                       |                                            |                                |                                       |
| <b>Camphor derivatives</b> |                                                                                     |                                                                                                                                                                                                           |                                                                                       |                                            |                                |                                       |
| 1                          | 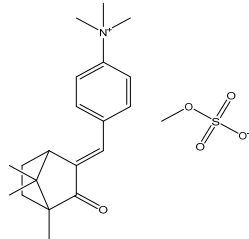   | <i>N,N,N</i> -trimethyl-4-[( <i>E</i> )-(4,7,7-trimethyl-3-oxobicyclo[2.2.1]hept-2-ylidene)methyl]anilinium methyl sulfate                                                                                | Camphor benzalkonium methosulfate (CBM)                                               | 6%                                         | Organic UVB absorber           | 409.54                                |
| 2                          |    | [(3 <i>E</i> )-3-[[4-[( <i>Z</i> )-[7,7-dimethyl-3-oxo-4-(sulfomethyl)-2-bicyclo[2.2.1]heptanylidene]methyl]phenyl]methylidene]-7,7-dimethyl-2-oxo-1-bicyclo[2.2.1]heptanyl]methanesulfonic acid          |                                                                                       |                                            |                                | 562.69                                |
| 3                          |   | disodium;[(3 <i>E</i> )-3-[[4-[( <i>Z</i> )-[7,7-dimethyl-3-oxo-4-(sulfonatomethyl)-2-bicyclo[2.2.1]heptanylidene]methyl]phenyl]methylidene]-7,7-dimethyl-2-oxo-1-bicyclo[2.2.1]heptanyl]methanesulfonate | Terephthalate dicamphor sulfonic acid/ Ecamsule (TDSA) and its sodium and amine salts | 10%                                        | Organic UVA absorber           | 606.7                                 |
| 4                          |  | 2-bis(2-hydroxyethyl)aminoethanol;3-[[4-[[7,7-dimethyl-3-oxo-4-(sulfomethyl)-2-bicyclo[2.2.1]heptanylidene]methyl]phenyl]methylidene]-7,7-dimethyl-2-oxo-1-bicyclo[2.2.1]heptanyl]methanesulfonic acid    |                                                                                       |                                            |                                | 861.1                                 |
| 5                          |  | 4-[(4,7,7-trimethyl-3-oxo-2-bicyclo[2.2.1]heptanylidene)methyl]benzenesulfonic acid                                                                                                                       | Benzylidene camphor sulfonic acid (BCSA)                                              | 6%                                         | Organic UVB absorber           | 320.40                                |

|                                               |                                                                                     |                                                                                                                                                                                                        |                                                         |     |                                                                  |        |
|-----------------------------------------------|-------------------------------------------------------------------------------------|--------------------------------------------------------------------------------------------------------------------------------------------------------------------------------------------------------|---------------------------------------------------------|-----|------------------------------------------------------------------|--------|
| 6                                             | 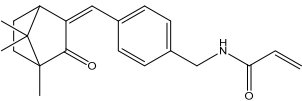   | Polymer of <i>N</i> -[(2 and 4)-[(2-oxoborn-3-ylidene)methyl]benzyl]acrylamide<br>2-Propenamide, <i>N</i> -[[4-[(4,7,7-trimethyl-3-oxobicyclo[2.2.1]hept-2-ylidene)methyl]phenyl]methyl]-, homopolymer | Polyacrylamidomethyl<br>benzylidene camphor (PBC)       | 6%  | Organic<br>UVB absorber                                          | 323.44 |
| 7                                             |    | (3 <i>E</i> )-1,7,7-trimethyl-3-[(4-methylphenyl)methylidene]bicyclo[2.2.1]heptan-2-one                                                                                                                | 4-Methylbenzylidene Camphor/<br>Enzacamene (4-MBC)      | 4%  | Organic<br>UVB and UVA<br>absorbers                              | 254.37 |
| Salicylate derivatives                        |                                                                                     |                                                                                                                                                                                                        |                                                         |     |                                                                  |        |
| 8                                             |    | (3,3,5-trimethylcyclohexyl) 2-hydroxybenzoate                                                                                                                                                          | Homosalate (HMS)                                        | 10% | Organic<br>UVB and UVA<br>absorber                               | 262.35 |
| 9                                             |    | 2-ethylhexyl 2-hydroxybenzoate                                                                                                                                                                         | Ethylhexyl salicylate/ octisalate<br>(EHS)              | 5%  | Organic<br>UVB and UVA<br>absorber                               | 250.34 |
| Benzophenone and dibenzoylmethane derivatives |                                                                                     |                                                                                                                                                                                                        |                                                         |     |                                                                  |        |
| 10                                            |  | (2-hydroxy-4-methoxyphenyl)(phenyl) methanone/ oxybenzone                                                                                                                                              | Benzophenone-3 (BP-3)                                   | 6%  | Organic<br>UVB and UVA<br>absorber<br>Benzophenone<br>derivative | 228.25 |
| 11                                            |  | 1-(4- <i>tert</i> -butylphenyl)-3-(4-methoxyphenyl)propane-1,3-dione                                                                                                                                   | Butyl<br>methoxydibenzoylmethane/<br>avobenzene (BMDBM) | 5%  | Organic<br>UVB and UVA<br>absorber                               | 310.4  |

|                                             |                                                                                     |                                                             |                                                      |    |                              | Dibenzoylmethane derivative |
|---------------------------------------------|-------------------------------------------------------------------------------------|-------------------------------------------------------------|------------------------------------------------------|----|------------------------------|-----------------------------|
| 12                                          | 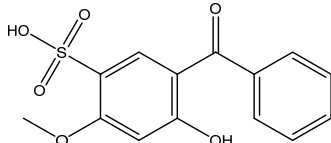   | 5-benzoyl-4-hydroxy-2-methoxybenzene-1-sulfonic acid        | Benzophenone-4/ sulisobenzone (BP-4)                 | 5% | Organic UVB and UVA absorber | 308.30                      |
| 13                                          |    | sodium;5-benzoyl-4-hydroxy-2-methoxybenzenesulfonate        | Benzophenone-5 (BP-5)                                |    | Benzophenone derivatives     | 330.29                      |
| Benzimidazole and Benzotriazole derivatives |                                                                                     |                                                             |                                                      |    |                              |                             |
| 14                                          |    | 2-phenyl-1 <i>H</i> -1,3-benzodiazole-5-sulfonic acid       |                                                      |    |                              | 274.29                      |
| 15                                          |  | Potassium 2-phenyl-1 <i>H</i> -1,3-benzodiazole-5-sulfonate | Phenylbenzimidazole sulfonic acid/ Ensulizole (PBSA) | 8% | Organic UVB and UVA absorber | 312.38                      |
| 16                                          |  | Sodium 2-phenyl-1 <i>H</i> -1,3-benzodiazole-5-sulfonate    |                                                      |    | Benzimidazole derivative     | 296.28                      |

|                       |                                                                                     |                                                                                                                                             |                                               |     |                                                                    |        |
|-----------------------|-------------------------------------------------------------------------------------|---------------------------------------------------------------------------------------------------------------------------------------------|-----------------------------------------------|-----|--------------------------------------------------------------------|--------|
| 17                    | 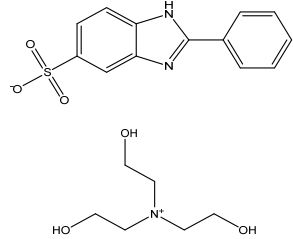   | Triethanolamine 2-phenyl-1H-1,3-benzodiazole-5-sulfonate                                                                                    |                                               |     |                                                                    | 423.48 |
| 18                    |    | 2-(benzotriazol-2-yl)-4-methyl-6-[2-methyl-3-[methyl-bis(trimethylsilyloxy)silyl]propyl]phenol                                              | Drometrizole Trisiloxane (DRT)                | 15% | Organic<br>UVB and UVA<br>absorbers<br>Benzotriazole<br>derivative | 501.85 |
| 19                    |    | 2-(benzotriazol-2-yl)-6-[[3-(benzotriazol-2-yl)-2-hydroxy-5-(2,4,4-trimethylpentan-2-yl)phenyl]methyl]-4-(2,4,4-trimethylpentan-2-yl)phenol | Bisotrizole/ Bisotrizole (nano) (MBBT)        | 10% | Organic<br>UVB and UVA<br>absorber<br>Benzotriazole<br>derivative  | 658.89 |
| 20                    |  | disodium;6-sulfo-2-[4-(6-sulfo-4-sulfonato-1H-benzimidazol-2-yl)phenyl]-1H-benzimidazole-4-sulfonate                                        | Bisdisulizole disodium (DPDT)                 | 10% | Organic<br>UVA absorber<br>Benzimidazole<br>derivative             | 674.55 |
| Cinnamate derivatives |                                                                                     |                                                                                                                                             |                                               |     |                                                                    |        |
| 21                    |  | 2-ethylhexyl 4-methoxycinnamate                                                                                                             | Ethylhexyl methoxycinnamate/octinoxate (EHMC) | 10% | Organic<br>UVB and UVA<br>absorber                                 | 290.40 |

|                                   |                                                                                     |                                                                                                                                              |                                                       |     |                                                            |        |
|-----------------------------------|-------------------------------------------------------------------------------------|----------------------------------------------------------------------------------------------------------------------------------------------|-------------------------------------------------------|-----|------------------------------------------------------------|--------|
| 22                                | 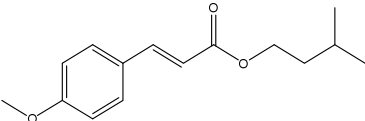   | 3-methylbutyl (E)-3-(4-methoxyphenyl)prop-2-enoate                                                                                           | Isoamyl p-methoxycinnamate/<br>amiloxate (IMC)        | 10% | Organic<br>UVB and UVA<br>absorber                         | 248.32 |
| PABA derivatives                  |                                                                                     |                                                                                                                                              |                                                       |     |                                                            |        |
| 23                                |    | 2-hydroxyethyl 4-(bis(2-(2-hydroxyethoxy)ethyl)amino)benzoate                                                                                | PEG-25 PABA                                           | 10% | Organic<br>UVB absorber                                    | 357.40 |
| 24                                |    | 2-ethylhexyl 4-(dimethylamino)benzoate                                                                                                       | Padimate O (EHDB)                                     | 8%  | Organic<br>UVB absorber                                    | 277.41 |
| Triazine and Triazone Derivatives |                                                                                     |                                                                                                                                              |                                                       |     |                                                            |        |
| 25                                |    | 2-ethylhexyl 4-[[[4,6-bis[4-(2-ethylhexoxycarbonyl)anilino]-1,3,5-triazin-2-yl]amino]benzoate                                                | Octyl triazone/ Ethylhexyl<br>triazone (OT/ EHT)      | 5%  | Organic<br>UVB and UVA<br>absorber<br>Triazone derivative  | 823.09 |
| 26                                |   | 2-ethylhexyl 4-[(4-[[[4-(tert-butylcarbamoyl)phenyl]amino]-6-[(4-((2-ethylhexyl)oxy)carbonyl]phenyl)amino]-1,3,5-triazin-2-yl]amino]benzoate | Diethylhexyl Butamido<br>Triazone/ Iscotrizinol (DBT) | 10% | Organic<br>UVB and UVA<br>absorbers<br>Triazone derivative | 765.98 |
| 27                                |  | 5-(2-ethylhexoxy)-2-[4-[4-(2-ethylhexoxy)-2-hydroxyphenyl]-6-(4-methoxyphenyl)-1,3,5-triazin-2-yl]phenol                                     | Bemotrizinol (BEMT)                                   | 10% | Organic<br>UVB and UVA<br>absorber<br>Triazine derivative  | 627.83 |

|               |                                                                                                                                                                                                                                                                                                                                     |                                                      |                                                                     |     |                                                                                      |        |
|---------------|-------------------------------------------------------------------------------------------------------------------------------------------------------------------------------------------------------------------------------------------------------------------------------------------------------------------------------------|------------------------------------------------------|---------------------------------------------------------------------|-----|--------------------------------------------------------------------------------------|--------|
| 28            | 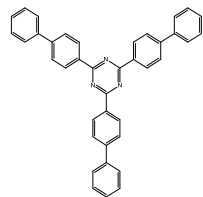                                                                                                                                                                                                                                                   | 2,4,6-tris(4-phenylphenyl)-1,3,5-triazine            | Tris-biphenyl triazine and Tris-biphenyl triazine (nano) (TBT/TBPT) | 10% | Organic<br>UVB and UVA<br>absorber<br>Triazine derivative                            | 537.67 |
| 29            |                                                                                                                                                                                                                                                    | 3,3'-(1,4-phenylene)bis(5,6-diphenyl-1,2,4-triazine) | Phenylene Bis-Diphenyl triazine                                     | 5%  | Organic<br>Triazine derivative<br>UVA and UVB<br>absorber<br>Triazine<br>derivatives | 540.63 |
| Other classes |                                                                                                                                                                                                                                                                                                                                     |                                                      |                                                                     |     |                                                                                      |        |
| 30            |                                                                                                                                                                                                                                                    | 2-ethylhexyl 2-cyano-3,3-diphenylprop-2-enoate       | Octocrylene (OC/ OCR)                                               | 10% | Organic<br>UVB and UVA<br>absorber                                                   | 361.49 |
| 31            | <br>R =<br>H (0.1-0.4%)<br>CH <sub>3</sub> (92.1-92.5%)<br> (6%)<br> (1.5%) | Dimethicodiethylbenzalmalonate                       | Polysilicone-15 (PS-15)                                             | 10% | Organic<br>UVB and UVA<br>absorber                                                   | -      |

|                      |                                                                                   |                                                                                       |                                                                    |     |                                        |        |
|----------------------|-----------------------------------------------------------------------------------|---------------------------------------------------------------------------------------|--------------------------------------------------------------------|-----|----------------------------------------|--------|
| 32                   | 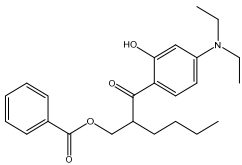 | hexyl 2-[4-(diethylamino)-2-hydroxybenzoyl]benzoate                                   | Diethylamino hydroxybenzoyl<br>hexyl benzoate (DHHB)               | 10% | Organic UVA<br>absorber                | 397.52 |
| 33                   |  | 2-ethoxyethyl (2Z)-2-cyano-2-[3-(3-methoxypropylamino)cyclohex-2-en-1-ylidene]acetate | Methoxypropylamino<br>Cyclohexenylidene<br>Ethoxyethylcyanoacetate | 3%  | Organic<br>UVA and UVB<br>absorber     | 322.41 |
| Inorganic UV Filters |                                                                                   |                                                                                       |                                                                    |     |                                        |        |
| 34                   |  | Titanium Dioxide/ dioxotitanium                                                       | Titanium dioxide and titanium<br>dioxide TiO <sub>2</sub> (nano)   | 25% | Inorganic<br>UVB and UVA<br>reflectors | 79.87  |
| 35                   |  | Zinc oxide/ oxozinc                                                                   | Zinc oxide and zinc oxide<br>(nano) (ZnO)                          | 25% | Inorganic<br>UVB and UVA<br>reflectors | 81.38  |



**Table S2.** Synthetic derivatives with photoprotective and antioxidant activities, as potential UV filters.

| Number | Chemical structure                                                                  | Activity        | Values                               | Reference |
|--------|-------------------------------------------------------------------------------------|-----------------|--------------------------------------|-----------|
| 57     | 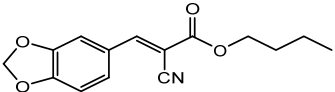   |                 | SPF = 1<br>$\lambda_c$ = 382 nm      |           |
| 58     |    |                 | SPF = 2<br>$\lambda_c$ = 390 nm      |           |
| 59     |    |                 | SPF = 5<br>$\lambda_c$ = 340 nm      |           |
| 60     |    | Photoprotective | SPF = 4<br>$\lambda_c$ = 378 nm      | [126]     |
| 61     |    |                 | SPF = 3<br>$\lambda_c$ = 377 nm      |           |
| 62     |   |                 | SPF = 5<br>$\lambda_c$ = 375 nm      |           |
| 63     |  |                 | SPF = 2<br>$\lambda_c$ = 369 nm      |           |
| 64     |  |                 | SPF = 2<br>$\lambda_c$ = 387 nm      |           |
| 65     |  | Photoprotective | $\lambda_{max}$ = 275 nm             | [127]     |
|        |                                                                                     | Phototoxicity   | PIF = 0.916 – 1.281 (Non-phototoxic) |           |
| 66     |  | Photoprotective | $\lambda_{max}$ = 285 nm             |           |
|        |                                                                                     | Phototoxicity   | PIF = 0.920 – 1.00 (Non-phototoxic)  |           |
| 67     |  | Photoprotective | $\lambda_{max}$ = 292 nm             |           |
|        |                                                                                     | Phototoxicity   | PIF = 2.60 -2.80 (Phototoxic)        |           |
| 68     |                                                                                     | Photoprotective | $\lambda_{max}$ = 275 nm             |           |

|    |                                                                                     |                                                                                                                      |                                                                        |       |
|----|-------------------------------------------------------------------------------------|----------------------------------------------------------------------------------------------------------------------|------------------------------------------------------------------------|-------|
|    | 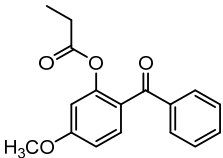   | Phototoxicity                                                                                                        | PIF = 5.59 – 16.5 (Phototoxic)                                         |       |
| 69 |    | Photoprotective                                                                                                      | SPF = 16.20 at $3.0 \times 10^{-2}$ mg/mL<br>$\lambda_{\max}$ = 323 nm | [128] |
| 70 |    | Photoprotective                                                                                                      | SPF = 7.63 at $3.0 \times 10^{-2}$ mg/mL<br>$\lambda_{\max}$ = 308 nm  |       |
| 71 |    | Photoprotective                                                                                                      | SPF = 20.60                                                            |       |
| 72 |   | Photoprotective                                                                                                      | SPF = 26.17                                                            | [129] |
| 73 |  | Photoprotective                                                                                                      | $\lambda_{\max}$ = 308 nm<br>SPF = $4.74 \pm 0.15$                     |       |
|    |                                                                                     | Antioxidant (DPPH)                                                                                                   | $2.04 \pm 0.15$ $\mu$ mol Trolox/<br>mmol                              |       |
|    |                                                                                     | Phototoxicity (at 20 $\mu$ M and UVA<br>20 J/cm <sup>2</sup> and UVB 0.5 J/cm <sup>2</sup> ) in %<br>of viable cells | $77.3 \pm 2.8\%$ and $78.0 \pm 3.5\%$                                  |       |
| 74 |  | Photoprotective                                                                                                      | $\lambda_{\max}$ = 313 nm<br>SPF = $9.83 \pm 0.64$                     | [130] |
|    |                                                                                     | Antioxidant (DPPH)                                                                                                   | $2145.31 \pm 45.8$ $\mu$ mol Trolox/<br>mmol                           |       |
|    |                                                                                     | Phototoxicity (at 50 $\mu$ M and UVA<br>20 J/cm <sup>2</sup> and UVB 0.5 J/cm <sup>2</sup> ) in %<br>of viable cells | $77.4 \pm 4.0\%$ and $71.5 \pm 2.5\%$                                  |       |
|    |                                                                                     | Photostability (solar simulator for<br>1 hour before repeating HPLC<br>analysis)                                     | 94.9%                                                                  |       |

|    |  |                                                                                                                            |                                                            |
|----|--|----------------------------------------------------------------------------------------------------------------------------|------------------------------------------------------------|
| 75 |  | Photoprotective                                                                                                            | $\lambda_{\max} = 315 \text{ nm}$<br>SPF = $2.22 \pm 0.13$ |
|    |  | Antioxidant (DPPH)                                                                                                         | $2.03 \pm 0.09 \text{ } \mu\text{mol Trolox/ mmol}$        |
|    |  | Phototoxicity (at 50 $\mu\text{M}$ and UVA<br>20 J/cm <sup>2</sup> and UVB 0.5 J/cm <sup>2</sup> ) in %<br>of viable cells | $76.9 \pm 2.0\%$ and $74.3 \pm 3.2\%$                      |
|    |  |                                                                                                                            |                                                            |
| 76 |  | Photoprotective                                                                                                            | $\lambda_{\max} = 318 \text{ nm}$<br>SPF = $2.18 \pm 0.14$ |
|    |  | Antioxidant (DPPH)                                                                                                         | $21.41 \pm 0.43 \text{ } \mu\text{mol Trolox/ mmol}$       |
|    |  | Phototoxicity (at 50 $\mu\text{M}$ and UVA<br>20 J/cm <sup>2</sup> and UVB 0.5 J/cm <sup>2</sup> ) in %<br>of viable cells | $79.0 \pm 6.0\%$ and $70.8 \pm 3.9\%$                      |
|    |  |                                                                                                                            |                                                            |
| 77 |  | Photoprotective                                                                                                            | $\lambda_{\max} = 328 \text{ nm}$<br>SPF = $5.99 \pm 0.12$ |
|    |  | Antioxidant (DPPH)                                                                                                         | $1362.12 \pm 133.96 \text{ } \mu\text{mol Trolox/ mmol}$   |
|    |  | Phototoxicity (at 20 $\mu\text{M}$ and UVA<br>20 J/cm <sup>2</sup> and UVB 0.5 J/cm <sup>2</sup> ) in %<br>of viable cells | $18.4 \pm 2.3\%$ and $59.3 \pm 3.4\%$                      |
|    |  |                                                                                                                            |                                                            |
| 78 |  | Photoprotective                                                                                                            | $\lambda_{\max} = 306 \text{ nm}$                          |
|    |  | Antioxidant (DPPH)                                                                                                         | $1.67 \pm 0.08 \text{ } \mu\text{mol Trolox/ mmol}$        |
|    |  | Phototoxicity (at 20 $\mu\text{M}$ and UVA<br>20 J/cm <sup>2</sup> and UVB 0.5 J/cm <sup>2</sup> ) in %<br>of viable cells | $72.8 \pm 2.9\%$ and $74.2 \pm 1.3\%$                      |
|    |  |                                                                                                                            |                                                            |
| 79 |  | Photoprotective                                                                                                            | $\lambda_{\max} = 311 \text{ nm}$<br>SPF = $5.20 \pm 0.20$ |
|    |  | Antioxidant (DPPH)                                                                                                         | $1974.58 \pm 16.89 \text{ } \mu\text{mol Trolox/ mmol}$    |
|    |  | Phototoxicity (at 50 $\mu\text{M}$ and UVA<br>20 J/cm <sup>2</sup> and UVB 0.5 J/cm <sup>2</sup> ) in %<br>of viable cells | $62.9 \pm 4.3\%$ and $72.8 \pm 1.0\%$                      |
|    |  |                                                                                                                            |                                                            |

|    |                                                                                     |                                                                                                                      |                                                            |
|----|-------------------------------------------------------------------------------------|----------------------------------------------------------------------------------------------------------------------|------------------------------------------------------------|
| 80 | 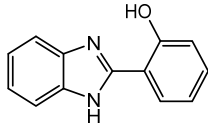   | Photoprotective                                                                                                      | $\lambda_{\max} = 315 \text{ nm}$<br>SPF = $3.57 \pm 0.23$ |
|    |                                                                                     | Antioxidant (DPPH)                                                                                                   | $16.47 \pm 0.54 \text{ } \mu\text{mol Trolox/ mmol}$       |
|    |                                                                                     | Phototoxicity (at 50 $\mu\text{M}$ and UVA 20 J/cm <sup>2</sup> and UVB 0.5 J/cm <sup>2</sup> ) in % of viable cells | $3.7 \pm 0.5\%$ and $1.1 \pm 0.3\%$                        |
|    |                                                                                     |                                                                                                                      |                                                            |
| 81 |    | Photoprotective                                                                                                      | $\lambda_{\max} = 315 \text{ nm}$<br>SPF = $1.96 \pm 0.14$ |
|    |                                                                                     | Antioxidant (DPPH)                                                                                                   | $0.87 \pm 0.05 \text{ } \mu\text{mol Trolox/ mmol}$        |
|    |                                                                                     | Phototoxicity (at 50 $\mu\text{M}$ and UVA 20 J/cm <sup>2</sup> and UVB 0.5 J/cm <sup>2</sup> ) in % of viable cells | $4.8 \pm 0.6\%$ and $19.8 \pm 2.4\%$                       |
|    |                                                                                     |                                                                                                                      |                                                            |
| 82 |  | Photoprotective                                                                                                      | $\lambda_{\max} = 325 \text{ nm}$<br>SPF = $2.85 \pm 0.22$ |
|    |                                                                                     | Antioxidant (DPPH)                                                                                                   | $1811.02 \pm 61.7 \text{ } \mu\text{mol Trolox/ mmol}$     |
|    |                                                                                     | Phototoxicity (at 50 $\mu\text{M}$ and UVA 20 J/cm <sup>2</sup> and UVB 0.5 J/cm <sup>2</sup> ) in % of viable cells | $1.2 \pm 0.2\%$ and $45.6 \pm 2.6\%$                       |
|    |                                                                                     |                                                                                                                      |                                                            |
| 83 |  | Photoprotective                                                                                                      | $\lambda_{\max} = 317 \text{ nm}$<br>SPF = $2.21 \pm 0.17$ |
|    |                                                                                     | Antioxidant (DPPH)                                                                                                   | $1771.82 \pm 84.75 \text{ } \mu\text{mol Trolox/ mmol}$    |
|    |                                                                                     | Phototoxicity (at 50 $\mu\text{M}$ and UVA 20 J/cm <sup>2</sup> and UVB 0.5 J/cm <sup>2</sup> ) in % of viable cells | $74.3 \pm 2.0\%$ and $76.3 \pm 3.6\%$                      |
|    |                                                                                     |                                                                                                                      |                                                            |
|    |                                                                                     | Photostability (solar simulator for 1 hour before repeating HPLC analysis)                                           | 98.4%                                                      |
|    |                                                                                     |                                                                                                                      |                                                            |

|    |                                                                                     |                                                                                                                  |                                                                   |
|----|-------------------------------------------------------------------------------------|------------------------------------------------------------------------------------------------------------------|-------------------------------------------------------------------|
| 84 | 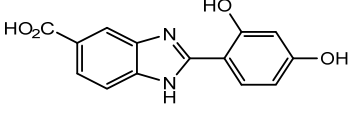   | Photoprotective                                                                                                  | $\lambda_{\max} = 321 \text{ nm}$<br>$\text{SPF} = 2.85 \pm 0.17$ |
|    |                                                                                     | Antioxidant (DPPH)                                                                                               | $32.48 \pm 2.38 \text{ } \mu\text{mol Trolox/ mmol}$              |
|    |                                                                                     | Phototoxicity (at 50 $\mu\text{M}$ and UVA 20 $\text{J/cm}^2$ and UVB 0.5 $\text{J/cm}^2$ ) in % of viable cells | $80.7 \pm 1.3\%$ and $69.0 \pm 0.2\%$                             |
| 85 |    | Photoprotective                                                                                                  | $\lambda_{\max} = 312 \text{ nm}$<br>$\text{SPF} = 6.01 \pm 0.31$ |
|    |                                                                                     | Antioxidant (DPPH)                                                                                               | $1.185 \pm 0.02 \text{ } \mu\text{mol Trolox/ mmol}$              |
|    |                                                                                     | Phototoxicity (at 50 $\mu\text{M}$ and UVA 20 $\text{J/cm}^2$ and UVB 0.5 $\text{J/cm}^2$ ) in % of viable cells | $76.7 \pm 3.4\%$ and $74.2 \pm 3.4\%$                             |
| 86 |  | Photoprotective                                                                                                  | $\lambda_{\max} = 332 \text{ nm}$<br>$\text{SPF} = 3.69 \pm 0.24$ |
|    |                                                                                     | Antioxidant (DPPH)                                                                                               | $1241.03 \pm 9.43 \text{ } \mu\text{mol Trolox/ mmol}$            |
|    |                                                                                     | Phototoxicity (at 50 $\mu\text{M}$ and UVA 20 $\text{J/cm}^2$ and UVB 0.5 $\text{J/cm}^2$ ) in % of viable cells | $12.2 \pm 1.3\%$ and $60.1 \pm 2.3\%$                             |
| 87 |  | Photoprotective (1-3% of the compound)                                                                           | $\text{SPF} = 2.44 - 3.06$<br>$\lambda_c = 341 - 364 \text{ nm}$  |
|    |                                                                                     | Antioxidant (DPPH)                                                                                               | % inhibition = $70.00 \pm 3.25$                                   |
| 88 |  | Photoprotective (1-3% of the compound)                                                                           | $\text{SPF} = 6.84 - 11.15$<br>$\lambda_c = 368 - 371 \text{ nm}$ |
|    |                                                                                     | Antioxidant (DPPH)                                                                                               | % inhibition = $15.46 \pm 0.98$                                   |

[131]

|    |  |                                        |                                                 |
|----|--|----------------------------------------|-------------------------------------------------|
| 89 |  | Photoprotective (1-3% of the compound) | SPF = 2.41 - 2.79<br>$\lambda_c$ = 340 – 344 nm |
|    |  | Antioxidant (DPPH)                     | % inhibition = 35.05 ± 0.87                     |
| 90 |  | Photoprotective                        | SPF = 9.0 ± 0.1<br>$\lambda_c$ = 371 nm         |
|    |  | Antioxidant (DPPH) at 400 µM           | % inhibition = 2.4 ± 0.7                        |
| 91 |  | Photoprotective                        | SPF = 5.0 ± 0.2<br>$\lambda_c$ = 365 nm         |
|    |  | Antioxidant (DPPH) at 400 µM           | % inhibition = 6.1 ± 0.5                        |
| 92 |  | Photoprotective                        | SPF = 17.0 ± 0.6<br>$\lambda_c$ = 371 nm        |
|    |  | Antioxidant (DPPH) at 400 µM           | % inhibition = 0.8 ± 0.3                        |
| 93 |  | Photoprotective                        | SPF = 4.0 ± 1.7<br>$\lambda_c$ = 356 nm         |
|    |  | Antioxidant (DPPH) at 400 µM           | % inhibition = 6.3 ± 0.7                        |
| 94 |  | Photoprotective                        | SPF = 7.0 ± 0.8<br>$\lambda_c$ = 363 nm         |
|    |  | Antioxidant (DPPH) at 400 µM           | % inhibition = 8.2 ± 1.6                        |
| 95 |  | Photoprotective                        | SPF = 4.0 ± 0.2<br>$\lambda_c$ = 383 nm         |
|    |  | Antioxidant (DPPH) at 400 µM           | % inhibition = 3.5 ± 0.4                        |

[25]

|     |  |                                                                  |                                                         |
|-----|--|------------------------------------------------------------------|---------------------------------------------------------|
| 96  |  | Photoprotective                                                  | SPF = $14.0 \pm 1.7$<br>$\lambda_c$ = 360 nm            |
|     |  | Antioxidant (DPPH) at 400 $\mu$ M                                | % inhibition = $5.9 \pm 0.6$                            |
| 97  |  | Photoprotective                                                  | SPF = $3.0 \pm 0.2$<br>$\lambda_c$ = 382 nm             |
|     |  | Antioxidant (DPPH) at 400 $\mu$ M                                | % inhibition = $75.6 \pm 0.2$                           |
| 98  |  | Photoprotective                                                  | SPF = 4.79<br>$\lambda_c$ = 339 nm                      |
| 99  |  | Photoprotective                                                  | SPF = 3.20<br>$\lambda_c$ = 363 nm                      |
| 100 |  | Photoprotective                                                  | SPF = 3.16<br>$\lambda_c$ = 367 nm                      |
| 101 |  | Photoprotective                                                  | SPF = 2.00<br>$\lambda_c$ = 386 nm                      |
|     |  | Cytotoxicity (human keratinocytes (K) and human fibroblasts (F)) | % cell viability (K) = 93<br>% cell viability (F) = 105 |
| 102 |  | Photoprotective                                                  | SPF = 2.50<br>$\lambda_c$ = 379 nm                      |
|     |  | Cytotoxicity (human keratinocytes (K) and human fibroblasts (F)) | % cell viability (K) = 98<br>% cell viability (F) = 89  |

[132]

|     |                                                                                     |                                                                                         |                                                                                                   |
|-----|-------------------------------------------------------------------------------------|-----------------------------------------------------------------------------------------|---------------------------------------------------------------------------------------------------|
| 103 | 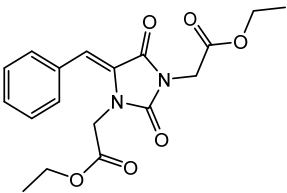   | Photoprotective                                                                         | SPF = 2.97<br>$\lambda_c$ = 331 nm                                                                |
| 104 |    | Photoprotective<br><br>Cytotoxicity (human keratinocytes (K) and human fibroblasts (F)) | SPF = 3.07<br>$\lambda_c$ = 366 nm<br><br>% cell viability (K) = 95<br>% cell viability (F) = 107 |
| 105 |    | Photoprotective                                                                         | SPF = 2.49<br>$\lambda_c$ = 370 nm                                                                |
| 106 |  | Photoprotective                                                                         | SPF = 1.84<br>$\lambda_c$ = 383 nm                                                                |
| 107 |  | Photoprotective                                                                         | SPF = 1.87<br>$\lambda_c$ = 382 nm                                                                |
| 108 |  | Photoprotective<br><br>Cytotoxicity (human keratinocytes (K) and human fibroblasts (F)) | SPF = 1.87<br>$\lambda_c$ = 381 nm<br><br>% cell viability (K) = 100<br>% cell viability (F) = 94 |
| 109 |  | Photoprotective<br><br>Cytotoxicity (human keratinocytes (K) and human fibroblasts (F)) | SPF = 1.68<br>$\lambda_c$ = 391 nm<br><br>% cell viability (K) = 100<br>% cell viability (F) = 97 |



|     |                                                                                     |                                                                            |                                            |
|-----|-------------------------------------------------------------------------------------|----------------------------------------------------------------------------|--------------------------------------------|
| 110 | 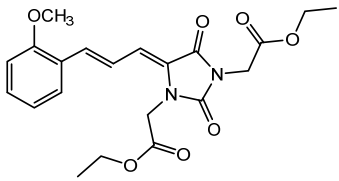   | Photoprotective                                                            | SPF = 1.94<br>$\lambda_c = 389 \text{ nm}$ |
| 111 |    | Photoprotective (after UV irradiation of 8.32 W/m <sup>2</sup> for 1 hour) | LoA = 18%                                  |
|     |                                                                                     | Antioxidant (DPPH)                                                         | IC <sub>50</sub> = 22.2 ± 1.1 nmol         |
| 112 |    | Photoprotective (after UV irradiation of 8.32 W/m <sup>2</sup> for 1 hour) | LoA = 22%                                  |
|     |                                                                                     | Antioxidant (DPPH)                                                         | -                                          |
| 113 |   | Photoprotective (after UV irradiation of 8.32 W/m <sup>2</sup> for 1 hour) | LoA = 31%                                  |
|     |                                                                                     | Antioxidant (DPPH)                                                         | -                                          |
| 114 |  | Photoprotective (after UV irradiation of 8.32 W/m <sup>2</sup> for 1 hour) | LoA = 26%                                  |
|     |                                                                                     | Antioxidant (DPPH)                                                         | IC <sub>50</sub> = 18.0 ± 0.9 nmol         |
| 115 |  | Photoprotective (after UV irradiation of 8.32 W/m <sup>2</sup> for 1 hour) | LoA = 35%                                  |
|     |                                                                                     | Antioxidant (DPPH)                                                         | IC <sub>50</sub> = 17.0 ± 0.7 nmol         |
| 116 |  | Photoprotective (after UV irradiation of 8.32 W/m <sup>2</sup> for 1 hour) | LoA = 21%                                  |
|     |                                                                                     | Antioxidant (DPPH)                                                         | IC <sub>50</sub> = 19.9 ± 1.0 nmol         |
| 117 |  | Photoprotective (after UV irradiation of 8.32 W/m <sup>2</sup> for 1 hour) | LoA = 52%                                  |
|     |                                                                                     | Antioxidant (DPPH)                                                         | IC <sub>50</sub> = 14.4 ± 0.4 nmol         |

[133]

|     |                                                                                     |                                                                            |                                    |
|-----|-------------------------------------------------------------------------------------|----------------------------------------------------------------------------|------------------------------------|
| 118 | 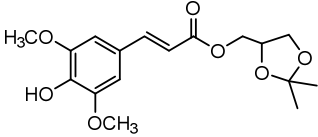   | Photoprotective (after UV irradiation of 8.32 W/m <sup>2</sup> for 1 hour) | LoA = 13%                          |
|     |                                                                                     | Antioxidant (DPPH)                                                         | IC <sub>50</sub> = 19.8 ± 1.0 nmol |
| 119 |    | Photoprotective (after UV irradiation of 8.32 W/m <sup>2</sup> for 1 hour) | LoA = 26%                          |
|     |                                                                                     | Antioxidant (DPPH)                                                         | IC <sub>50</sub> = 20.9 ± 1.1 nmol |
| 120 |    | Photoprotective (after UV irradiation of 8.32 W/m <sup>2</sup> for 1 hour) | LoA = 73%                          |
|     |                                                                                     | Antioxidant (DPPH)                                                         | IC <sub>50</sub> = 21.1 ± 1.1 nmol |
| 121 |   | Photoprotective (after UV irradiation of 8.32 W/m <sup>2</sup> for 1 hour) | LoA = 67%                          |
|     |                                                                                     | Antioxidant (DPPH)                                                         | IC <sub>50</sub> = 17.1 ± 0.8 nmol |
| 122 |  | Photoprotective (after UV irradiation of 8.32 W/m <sup>2</sup> for 1 hour) | LoA = 70%                          |
|     |                                                                                     | Antioxidant (DPPH)                                                         | IC <sub>50</sub> = 15.3 ± 0.5 nmol |
| 123 |  | Photoprotective (after UV irradiation of 8.32 W/m <sup>2</sup> for 1 hour) | LoA = 66%                          |
|     |                                                                                     | Antioxidant (DPPH)                                                         | IC <sub>50</sub> = 13.7 ± 0.6 nmol |
| 124 |  | Photoprotective (after UV irradiation of 8.32 W/m <sup>2</sup> for 1 hour) | LoA = 85%                          |
|     |                                                                                     | Antioxidant (DPPH)                                                         | IC <sub>50</sub> = 19.4 ± 0.9 nmol |
| 125 |  | Photoprotective (after UV irradiation of 8.32 W/m <sup>2</sup> for 1 hour) | LoA = 20%                          |
|     |                                                                                     | Antioxidant (DPPH)                                                         | IC <sub>50</sub> = 8.9 ± 0.3 nmol  |

|     |                                                                                     |                                                                            |                                    |
|-----|-------------------------------------------------------------------------------------|----------------------------------------------------------------------------|------------------------------------|
| 126 | 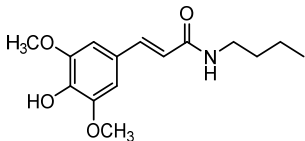   | Photoprotective (after UV irradiation of 8.32 W/m <sup>2</sup> for 1 hour) | LoA = 40%                          |
|     |                                                                                     | Antioxidant (DPPH)                                                         | IC <sub>50</sub> = 15.9 ± 0.7 nmol |
| 127 |    | Photoprotective (after UV irradiation of 8.32 W/m <sup>2</sup> for 1 hour) | LoA = 45%                          |
|     |                                                                                     | Antioxidant (DPPH)                                                         | IC <sub>50</sub> = 9.4 ± 0.4 nmol  |
| 128 |    | Antioxidant (DPPH)                                                         | IC <sub>50</sub> = 275 µM          |
|     |                                                                                     | Photoprotective                                                            | SPF = 3<br>λ <sub>c</sub> = 376 nm |
| 129 |   | Photoprotective                                                            | SPF = 5<br>λ <sub>c</sub> = 368 nm |
| 130 |  | Photoprotective                                                            | SPF = 4<br>λ <sub>c</sub> = 366 nm |
| 131 |  | Photoprotective                                                            | SPF = 2<br>λ <sub>c</sub> = 379 nm |
| 132 |  | Photoprotective                                                            | SPF = 2<br>λ <sub>c</sub> = 388 nm |
| 133 |  | Photoprotective                                                            | SPF = 4<br>λ <sub>c</sub> = 386 nm |
| 134 |  | Antioxidant (DPPH)                                                         | IC <sub>50</sub> = 88.2 µM         |
|     |                                                                                     | Photoprotective                                                            | SPF = 2<br>λ <sub>c</sub> = 389 nm |

[134]

|     |                                                                                     |                                                                            |                                             |       |
|-----|-------------------------------------------------------------------------------------|----------------------------------------------------------------------------|---------------------------------------------|-------|
| 135 | 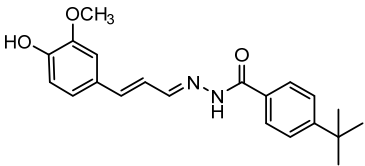   | Antioxidant (DPPH)                                                         | IC <sub>50</sub> = 109.6 µM                 |       |
|     |                                                                                     | Photoprotective                                                            | SPF = 2<br>λ <sub>c</sub> = 387 nm          |       |
| 136 |    | Photoprotective                                                            | SPF = 2.0 ± 0.5                             |       |
| 137 |    | Photoprotective                                                            | SPF = 10.0 ± 0.2<br>λ <sub>c</sub> = 383 nm |       |
| 138 |    | Photoprotective                                                            | SPF = 6.0 ± 0.7<br>λ <sub>c</sub> = 389 nm  |       |
| 139 |   | Photoprotective                                                            | SPF = 5.0 ± 0.3<br>λ <sub>c</sub> = 388 nm  | [135] |
| 140 |  | Photoprotective                                                            | SPF = 6.0 ± 1.1<br>λ <sub>c</sub> = 387 nm  |       |
| 141 |  | Photoprotective                                                            | SPF = 6.0 ± 1.1<br>λ <sub>c</sub> = 387 nm  |       |
| 142 |  | Photoprotective (after UV irradiation of 8.32 W/m <sup>2</sup> for 1 hour) | LoA = 19.1%                                 | [24]  |
|     |                                                                                     | Antioxidant (DPPH)                                                         | IC <sub>50</sub> = 7.9 nmol                 |       |
| 143 |  | Photoprotective (after UV irradiation of 8.32 W/m <sup>2</sup> for 1 hour) | LoA = 21.9%                                 |       |
|     |                                                                                     | Antioxidant (DPPH)                                                         | -                                           |       |

|     |                                                                                     |                                                                                  |                              |
|-----|-------------------------------------------------------------------------------------|----------------------------------------------------------------------------------|------------------------------|
| 144 | 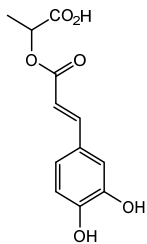   | Photoprotective (after UV<br>irradiation of 8.32 W/m <sup>2</sup> for 1<br>hour) | LoA = 20.2%                  |
|     |                                                                                     | Antioxidant (DPPH)                                                               | IC <sub>50</sub> = 9.9 nmol  |
| 145 |    | Photoprotective (after UV<br>irradiation of 8.32 W/m <sup>2</sup> for 1<br>hour) | LoA = 24.4%                  |
|     |                                                                                     | Antioxidant (DPPH)                                                               | IC <sub>50</sub> = 13.9 nmol |
| 146 |   | Photoprotective (after UV<br>irradiation of 8.32 W/m <sup>2</sup> for 1<br>hour) | LoA = 26.1%                  |
|     |                                                                                     | Antioxidant (DPPH)                                                               | IC <sub>50</sub> = 10.6 nmol |
| 147 |  | Photoprotective (after UV<br>irradiation of 8.32 W/m <sup>2</sup> for 1<br>hour) | LoA = 22.5%                  |
|     |                                                                                     | Antioxidant (DPPH)                                                               | -                            |
| 148 |  | Photoprotective (after UV<br>irradiation of 8.32 W/m <sup>2</sup> for 1<br>hour) | LoA = 31.5%                  |
|     |                                                                                     | Antioxidant (DPPH)                                                               | IC <sub>50</sub> = 6.8 nmol  |
| 149 |  | Photoprotective (after UV<br>irradiation of 8.32 W/m <sup>2</sup> for 1<br>hour) | LoA = 26.3%                  |
|     |                                                                                     | Antioxidant (DPPH)                                                               | IC <sub>50</sub> = 10.2 nmol |
| 150 |  | Photoprotective (after UV<br>irradiation of 8.32 W/m <sup>2</sup> for 1<br>hour) | LoA = 20.2%                  |
|     |                                                                                     | Antioxidant (DPPH)                                                               | -                            |

|     |                                                                                     |                                                                                  |                              |
|-----|-------------------------------------------------------------------------------------|----------------------------------------------------------------------------------|------------------------------|
| 151 | 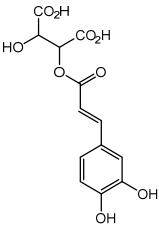   | Photoprotective (after UV<br>irradiation of 8.32 W/m <sup>2</sup> for 1<br>hour) | LoA = 16.1%                  |
|     |                                                                                     | Antioxidant (DPPH)                                                               | IC <sub>50</sub> = 5.2 nmol  |
| 152 |    | Photoprotective (after UV<br>irradiation of 8.32 W/m <sup>2</sup> for 1<br>hour) | LoA = 23.2%                  |
|     |                                                                                     | Antioxidant (DPPH)                                                               | IC <sub>50</sub> = 11.9 nmol |
| 153 |    | Photoprotective (after UV<br>irradiation of 8.32 W/m <sup>2</sup> for 1<br>hour) | LoA = 24.3%                  |
|     |                                                                                     | Antioxidant (DPPH)                                                               | IC <sub>50</sub> = 6.9 nmol  |
| 154 |  | Photoprotective (after UV<br>irradiation of 8.32 W/m <sup>2</sup> for 1<br>hour) | LoA = 15.7%                  |
|     |                                                                                     | Antioxidant (DPPH)                                                               | -                            |
| 155 |  | Photoprotective (after UV<br>irradiation of 8.32 W/m <sup>2</sup> for 1<br>hour) | LoA = 15.5%                  |
|     |                                                                                     | Antioxidant (DPPH)                                                               | IC <sub>50</sub> = 3.9 nmol  |
| 156 |  | Photoprotective (after UV<br>irradiation of 8.32 W/m <sup>2</sup> for 1<br>hour) | LoA = 14.3%                  |
|     |                                                                                     | Antioxidant (DPPH)                                                               | IC <sub>50</sub> = 5.5 nmol  |
| 157 |  | Photoprotective (after UV<br>irradiation of 8.32 W/m <sup>2</sup> for 1<br>hour) | LoA = 17.4%                  |
|     |                                                                                     | Antioxidant (DPPH)                                                               | EC <sub>50</sub> = 4.2 nmol  |

|     |                                                                                     |                                                                                                          |                                                                                                           |       |
|-----|-------------------------------------------------------------------------------------|----------------------------------------------------------------------------------------------------------|-----------------------------------------------------------------------------------------------------------|-------|
| 158 | 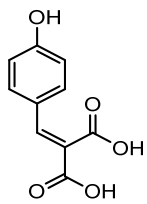   | Photoprotective (after UV irradiation of 8.32 W/m <sup>2</sup> for 1 hour)                               | LoA = 3.0%<br>$\lambda_{\max}$ = 314 nm                                                                   | [137] |
|     |                                                                                     | Antioxidant (DPPH)                                                                                       | -                                                                                                         |       |
| 159 |    | Photoprotective (after UV irradiation of 8.32 W/m <sup>2</sup> for 1 hour)                               | LoA = 1.9%<br>$\lambda_{\max}$ = 328 nm                                                                   |       |
|     |                                                                                     | Antioxidant (DPPH)                                                                                       | IC <sub>50</sub> (nmol) = 20.7                                                                            |       |
| 160 |    | Photoprotective (after UV irradiation of 8.32 W/m <sup>2</sup> for 1 hour)                               | LoA = 8.9%<br>$\lambda_{\max}$ = 330 nm                                                                   | [137] |
|     |                                                                                     | Antioxidant (DPPH)                                                                                       | IC <sub>50</sub> (nmol) = 3.9                                                                             |       |
| 161 |   | Photoprotective                                                                                          | LoA = 4.9%<br>$\lambda_{\max}$ = 340 nm                                                                   |       |
|     |                                                                                     | Antioxidant (DPPH)                                                                                       | IC <sub>50</sub> (nmol) = 3.0                                                                             |       |
| 162 |  | Phototoxicity                                                                                            | Cell viability = 100% (at 200 $\mu$ M in non-radiated and irradiated HaCaT keratinocytes)                 | [138] |
|     |                                                                                     | Antioxidant (DPPH)                                                                                       | IC <sub>50</sub> = 28.4 $\pm$ 0.2 $\mu$ M                                                                 |       |
| 163 |  | Antioxidant (DPPH)                                                                                       | IC <sub>50</sub> = 31.2 $\pm$ 4.8 $\mu$ M                                                                 |       |
| 164 |  | Antioxidant (DPPH)                                                                                       | IC <sub>50</sub> = 47.3 $\pm$ 0.4 $\mu$ M                                                                 |       |
| 165 |  | Photoprotective (1 hour after irradiation with solar light simulator conducted at 500 W/m <sup>2</sup> ) | $\lambda_{\max}$ = 303 nm<br>$\lambda_c$ = 345<br>SPF = 14.69<br>Decrease of SPF after irradiation 10.97% | [26]  |

|     |                                                                                     |                                                                                                             |                                                                                                              |
|-----|-------------------------------------------------------------------------------------|-------------------------------------------------------------------------------------------------------------|--------------------------------------------------------------------------------------------------------------|
| 166 | 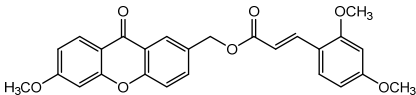   | Photoprotective (1 hour after irradiation with solar light simulator conducted at 500 W/m <sup>2</sup> )    | $\lambda_{\max} = 299, 329 \text{ nm}$<br>$\lambda_c = 381$<br>SPF = 19.69<br>SPF after irradiation = 17.25% |
|     |                                                                                     | Phototoxicity (human keratinocytes (K) HaCaT and skin fibroblasts (F)) at concentration of 50 $\mu\text{M}$ | % cell viability (K) = 82<br>% cell viability (F) = 80                                                       |
| 167 |    | Photoprotective                                                                                             | SPF = 4.0 $\pm$ 0.9<br>$\lambda_c = 387 \text{ nm}$                                                          |
| 168 |    | Photoprotective                                                                                             | SPF = 3.0 $\pm$ 0.5<br>$\lambda_c = 389 \text{ nm}$                                                          |
| 169 |  | Photoprotective                                                                                             | SPF = 3.0 $\pm$ 0.1<br>$\lambda_c = 388 \text{ nm}$                                                          |
| 170 |  | Photoprotective                                                                                             | SPF = 4.0 $\pm$ 0.0<br>$\lambda_c = 385 \text{ nm}$                                                          |
| 171 |  | Photoprotective                                                                                             | SPF = 3.0 $\pm$ 0.2<br>$\lambda_c = 388 \text{ nm}$                                                          |
| 172 |  | Photoprotective                                                                                             | SPF = 2.0 $\pm$ 0.3<br>$\lambda_c = 388 \text{ nm nm}$                                                       |
| 173 |  | Photoprotective                                                                                             | SPF = 2.0 $\pm$ 0.1<br>$\lambda_c = 386 \text{ nm}$                                                          |

[139]



|     |                                                                                     |                                                                            |                                                                                  |       |
|-----|-------------------------------------------------------------------------------------|----------------------------------------------------------------------------|----------------------------------------------------------------------------------|-------|
| 174 | 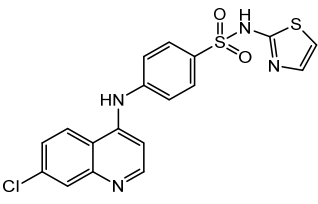   | Photoprotective                                                            | SPF = $4.0 \pm 0.4$<br>$\lambda_c$ = 385 nm                                      |       |
| 175 |    | Photoprotective                                                            | SPF = $4.0 \pm 0.0$<br>$\lambda_c$ = 381 nm                                      |       |
| 176 |    | Photoprotective                                                            | SPF = $11.0 \pm 0.1$<br>$\lambda_c$ = 376 nm                                     |       |
| 177 |   | Photoprotective                                                            | SPF = $6.0 \pm 0.3$<br>$\lambda_c$ = 377 nm                                      |       |
| 178 |  | Photoprotective                                                            | SPF = $3.0 \pm 0.4$<br>$\lambda_c$ = 384 nm                                      |       |
| 179 |  | Photoprotective                                                            | $\lambda_{max}$ = 339 nm<br>SPF = 17.30 (with 5% of the compound in formulation) | [140] |
| 180 |  | Photoprotective (after UV irradiation of 8.32 W/m <sup>2</sup> for 1 hour) | LoA = 11.4%                                                                      | [141] |
|     |                                                                                     | Antioxidant (DPPH)                                                         | IC <sub>50</sub> = $19.70 \pm 1.00$ mM                                           |       |
|     |                                                                                     | Tyrosinase inhibition                                                      | IC <sub>50</sub> = $17 \pm 2$ $\mu$ M                                            |       |
| 181 |  | Photoprotective (after UV irradiation of 8.32 W/m <sup>2</sup> for 1 hour) | LoA = 9.0%                                                                       | [141] |
|     |                                                                                     | Antioxidant (DPPH)                                                         | IC <sub>50</sub> > 400 mM                                                        |       |
|     |                                                                                     | Tyrosinase inhibition                                                      | IC <sub>50</sub> = $23 \pm 3$ $\mu$ M                                            |       |

|     |                                                                                     |                                                                            |                                    |
|-----|-------------------------------------------------------------------------------------|----------------------------------------------------------------------------|------------------------------------|
| 182 | 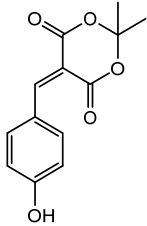   | Photoprotective (after UV irradiation of 8.32 W/m <sup>2</sup> for 1 hour) | LoA = 3.5%                         |
|     |                                                                                     | Antioxidant (DPPH)                                                         | IC <sub>50</sub> > 400 mM          |
|     |                                                                                     | Tyrosinase inhibition                                                      | IC <sub>50</sub> = 106 ± 13 µM     |
| 183 |    | Photoprotective (after UV irradiation of 8.32 W/m <sup>2</sup> for 1 hour) | LoA = 6.4%                         |
|     |                                                                                     | Antioxidant (DPPH)                                                         | IC <sub>50</sub> = 16.70 ± 0.80 mM |
|     |                                                                                     | Tyrosinase inhibition                                                      | IC <sub>50</sub> = 13 ± 2 µM       |
| 184 |   | Photoprotective (after UV irradiation of 8.32 W/m <sup>2</sup> for 1 hour) | LoA = 3.5%                         |
|     |                                                                                     | Antioxidant (DPPH)                                                         | IC <sub>50</sub> > 400 mM          |
|     |                                                                                     | Tyrosinase inhibition                                                      | IC <sub>50</sub> = 465 ± 56 µM     |
| 185 |  | Photoprotective (after UV irradiation of 8.32 W/m <sup>2</sup> for 1 hour) | LoA = 4.2%                         |
|     |                                                                                     | Antioxidant (DPPH)                                                         | -                                  |
|     |                                                                                     | Tyrosinase inhibition                                                      | -                                  |
| 186 |  | Photoprotective (after UV irradiation of 8.32 W/m <sup>2</sup> for 1 hour) | LoA = 5.1%                         |
|     |                                                                                     | Antioxidant (DPPH)                                                         | -                                  |
|     |                                                                                     | Tyrosinase inhibition                                                      | -                                  |
| 187 |  | Photoprotective (after UV irradiation of 8.32 W/m <sup>2</sup> for 1 hour) | LoA = 3.4%                         |
|     |                                                                                     | Antioxidant (DPPH)                                                         | IC <sub>50</sub> > 400 mM          |
|     |                                                                                     | Tyrosinase inhibition                                                      | -                                  |

|     |                                                                                     |                                                                            |                                |
|-----|-------------------------------------------------------------------------------------|----------------------------------------------------------------------------|--------------------------------|
| 188 | 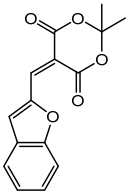   | Photoprotective (after UV irradiation of 8.32 W/m <sup>2</sup> for 1 hour) | LoA = 28.7%                    |
|     |                                                                                     | Antioxidant (DPPH)                                                         | -                              |
|     |                                                                                     | Tyrosinase inhibition                                                      | IC <sub>50</sub> = 252 ± 30 µM |
| 189 |    | Photoprotective (after UV irradiation of 8.32 W/m <sup>2</sup> for 1 hour) | LoA = 12.9%                    |
|     |                                                                                     | Antioxidant (DPPH)                                                         | -                              |
|     |                                                                                     | Tyrosinase inhibition                                                      | -                              |
| 190 |   | Photoprotective (after UV irradiation of 8.32 W/m <sup>2</sup> for 1 hour) | LoA = 12.4%                    |
|     |                                                                                     | Antioxidant (DPPH)                                                         | IC <sub>50</sub> > 400 mM      |
|     |                                                                                     | Tyrosinase inhibition                                                      | -                              |
| 191 |  | Photoprotective (after UV irradiation of 8.32 W/m <sup>2</sup> for 1 hour) | LoA = 0.1%                     |
|     |                                                                                     | Antioxidant (DPPH)                                                         | -                              |
|     |                                                                                     | Tyrosinase inhibition                                                      | -                              |
| 192 |  | Photoprotective (after UV irradiation of 8.32 W/m <sup>2</sup> for 1 hour) | LoA = 3.5%                     |
|     |                                                                                     | Antioxidant (DPPH)                                                         | -                              |
|     |                                                                                     | Tyrosinase inhibition                                                      | -                              |
| 193 |  | Photoprotective (after UV irradiation of 8.32 W/m <sup>2</sup> for 1 hour) | LoA = 11.9%                    |
|     |                                                                                     | Antioxidant (DPPH)                                                         | -                              |
|     |                                                                                     | Tyrosinase inhibition                                                      | -                              |

## References:

- Jussila, A.; Huotari-Orava, R.; Ylianttila, L.; Partonen, T.; Snellman, E., Narrow-band ultraviolet b radiation induces the expression of beta-endorphin in human skin in vivo. *J Photochem Photobiol B* **2016**, *155*, 104–108, 10.1016/j.jphotobiol.2016.01.007.
- Dahmane, R.; Pandel, R.; Trebse, P.; Poljsak, B., The role of sun exposure in skin aging. In *Sun exposure: Risk factors, protection practices and health effects*, Nova Science Publishers, Inc.: 2015; pp 1–40.
- Labille, J.; Catalano, R.; Slomberg, D.; Motellier, S.; Pinsino, A.; Hennebert, P.; Santaella, C.; Bartolomei, V., Assessing sunscreen lifecycle to minimize environmental risk posed by nanoparticulate uv-filters – a review for safer-by-design products. *Front Environ Sci* **2020**, *8*, 10.3389/fenvs.2020.00101.
- Ma, Y.; Yoo, J., History of sunscreen: An updated view. *J Cosmetol Dermatol* **2021**, *20*, 1044–1049, 10.1111/jocd.14004.
- Pawlowski, S.; Petersen-Thiery, M. Sustainable sunscreens: A challenge between performance, animal testing ban, and human and environmental safety. In *Handbook of Environmental Chemistry*, Springer: 2020; Vol. 94, pp 185–207.
- Abiola, T. T.; Whittock, A. L.; Stavros, V. G., Unravelling the photoprotective mechanisms of nature-inspired ultraviolet filters using ultrafast spectroscopy. *Molecules* **2020**, *25*, 10.3390/molecules25173945.
- L’Oreal. Garnier ambre solaire. 2020.
- Roelandts, R.; Vanhee, J.; Bonamie, A.; Kerkhofs, L.; Degreef, H., A survey of ultraviolet absorbers in commercially available sun products. *Int J Dermatol* **1983**, *22*, 247–255.
- Regulation (ec) n° 1223/2009 of the european parliament and of the council: Current consolidated version (01/10/2021).
- Bissonnette, R. Update on sunscreens.
- Chen, L. L.; Tooley, I.; Wang, S. Q., Nanotechnology in photoprotection. In *Nanotechnology in dermatology*, Springer New York: 2013; Vol. 9781461450344, pp 9–18.
- Valle-Sistac, J.; Molins-Delgado, D.; Díaz, M.; Ibáñez, L.; Barceló, D.; Silvia Díaz-Cruz, M., Determination of parabens and benzophenone-type uv filters in human placenta: First description of the existence of benzyl paraben and benzophenone-4. *Environ Int* **2016**, *88*, 243–249, 10.1016/j.envint.2015.12.034.
- Rehfeld, A.; Egeberg, D. L.; Almstrup, K.; Petersen, J. H.; Dissing, S.; Skakkebaek, N. E., EDC impact: Chemical uv filters can affect human sperm function in a progesterone-like manner. *Endocr Connect* **2018**, *7*, 16–25, 10.1530/EC-17-0156.
- Bachelot, M.; Li, Z.; Munaron, D.; Le Gall, P.; Casellas, C.; Fenet, H.; Gomez, E., Organic uv filter concentrations in marine mussels from french coastal regions. *Sci Total Environ* **2012**, *420*, 273–279, 10.1016/j.scitotenv.2011.12.051.
- He, H.; Li, A.; Li, S.; Tang, J.; Li, L.; Xiong, L., Natural components in sunscreens: Topical formulations with sun protection factor (spf). *Biomed Pharmacother* **2021**, *134*, 10.1016/j.biopha.2020.111161.
- Giraldo, A.; Montes, R.; Rodil, R.; Quintana, J. B.; Vidal-Liñán, L.; Beiras, R., Ecotoxicological evaluation of the uv filters ethylhexyl dimethyl p-aminobenzoic acid and octocrylene using marine organisms *isochrysis galbana*, *mytilus galloprovincialis* and *paracentrotus lividus*. *Arch Environ Contam Toxicol* **2017**, *72*, 606–611, 10.1007/s00244-017-0399-4.
- Lozano, C.; Givens, J.; Stien, D.; Matallana-Surget, S.; Lebaron, P. Bioaccumulation and toxicological effects of uv-filters on marine species. In *Handbook of Environmental Chemistry*, Springer: 2020; Vol. 94, pp 85–130.
- Bahia, M. F., *Proteção solar atualização*. 1st ed.; Editora da Universidade do Porto: 2003.
- Stiefel, C.; Schwack, W., Reactions of cosmetic uv filters with skin proteins: Model studies of esters with primary amines. *Trends Photochem Photobiol* **2013**, *15*, 105–116.
- Kockler, J.; Oelgemöller, M.; Robertson, S.; Glass, B. D., Photostability of sunscreens. *J Photochem Photobiol C Photochem Rev* **2012**, *13*, 91–110, 10.1016/j.jphotochemrev.2011.12.001.
- Cefali, L. C.; Ataíde, J. A.; Moriel, P.; Foglio, M. A.; Mazzola, P. G., Plant-based active photoprotectants for sunscreens. *Int J Cosmet Sci* **2016**, *38*, 346–353, 10.1111/ics.12316.

22. Vega, J.; Bonomi-Barufi, J.; Gomez-Pinchetti, J. L.; Figueroa, F. L., Cyanobacteria and red macroalgae as potential sources of antioxidants and uv radiation-absorbing compounds for cosmeceutical applications. *Mar Drugs* **2020**, *18*, 10.3390/md18120659.
23. Solano, F., Photoprotection and skin pigmentation: Melanin-related molecules and some other new agents obtained from natural sources. *Molecules* **2020**, *25*, 10.3390/molecules25071537.
24. Peyrot, C.; Mention, M. M.; Fournier, R.; Brunissen, F.; Couvreur, J.; Balaguer, P.; Allais, F., Expeditious and sustainable two-step synthesis of sinapoyl-l-malate and analogues: Towards non-endocrine disruptive bio-based and water-soluble bioactive compounds. *Green Chem* **2020**, *22*, 6510-6518, 10.1039/d0gc02763d.
25. Reis, J. S.; Corrêa, M. A.; Ribeiro, C. A.; Dos Santos, J. L., Synthesis and evaluation of 1,3,5-triazine derivatives as sunscreens useful to prevent skin cancer. *Bioorg Med Chem Lett* **2019**, *29*, 10.1016/j.bmcl.2019.126755.
26. Popiół, J.; Gunia-Krzyżak, A.; Słoczyńska, K.; Koczurkiewicz-Adamczyk, P.; Piska, K.; Wójcik-Pszczola, K.; Żelaszczyk, D.; Krupa, A.; Żmudzki, P.; Marona, H., *et al.*, The involvement of xanthone and (e)-cinnamoyl chromophores for the design and synthesis of novel sunscreens agents. *Int J Mol Sci* **2021**, *22*, 1-23, 10.3390/ijms22010034.
27. Herzog, B.; Wehrle, M.; Quass, K., Photostability of uv absorber systems in sunscreens. *Photochem Photobiol* **2009**, *85*, 869-878, 10.1111/j.1751-1097.2009.00544.x.
28. Bonda, C. A.; Lott, D., Sunscreen photostability. In *Principles and practice of photoprotection*, Springer International Publishing: 2016; pp 247-273.
29. Afonso, S.; Horita, K.; Sousa E Silva, J. P.; Almeida, I. F.; Amaral, M. H.; Lobão, P. A.; Costa, P. C.; Miranda, M. S.; Esteves Da Silva, J. C. G.; Sousa Lobo, J. M., Photodegradation of avobenzone: Stabilization effect of antioxidants. *J Photochem Photobiol B Biol* **2014**, *140*, 36-40, 10.1016/j.jphotobiol.2014.07.004.
30. Tarras-Wahlberg, N.; Stenhagen, G.; Larko, O.; Rosen, A.; Wennberg, A. M.; Wennerstrom, O., Changes in ultraviolet absorption of sunscreens after ultraviolet irradiation. *J Invest Dermatol* **1999**, *113*, 547-553, 10.1046/j.1523-1747.1999.00721.x.
31. Schwack, W.; Rudolph, T., Photochemistry of dibenzoyl methane uva filters - part 1. *J Photochem Photobiol B: Biol* **1995**, *28*, 229-234.
32. Downs, C. A.; DiNardo, J. C.; Stien, D.; Rodrigues, A. M. S.; Lebaron, P., Benzophenone accumulates over time from the degradation of octocrylene in commercial sunscreen products. *Chem Res Toxicol* **2021**, *34*, 1046-1054, 10.1021/acs.chemrestox.0c00461.
33. Roscher, N. M.; Lindemann, M.K.O.; Bin Kong, S.; Cho, C.G.; Jiang, P., Photodecomposition of several compounds commonly used as sunscreen agents. *J Photochem Photobiol A Chem* **1994**, *80*, 417-421.
34. Duarte, J.; Almeida, I. F.; Costa, M.; Da Silva, E. S.; Faria, J. L.; Sousa Lobo, J. M.; Costa, P. C.; Scalia, S., Alginate microparticles as carriers for the uv filter 2-ethylhexyl 4-methoxycinnamate: Influence on photostability. *Int J Cosmet Sci* **2019**, *41*, 585-593, 10.1111/ics.12578.
35. Chatelain, E.; Gabard, B., Photostabilization of butyl methoxydibenzoylmethane (avobenzone) and ethylhexyl methoxycinnamate by bis-ethylhexyloxyphenol methoxyphenyl triazine (tinosorb s), a new uv broadband filter. *Photochem Photobiol* **2001**, *74*, 401-406, 10.1562/0031-8655(2001)074<0401:POBMAA>2.0.CO;2.
36. Kockler, J.; Oelgemöller, M.; Robertson, S.; Glass, B. D., Influence of titanium dioxide particle size on the photostability of the chemical uv-filters butyl methoxy dibenzoylmethane and octocrylene in a microemulsion. *Cosmetics* **2014**, *1*, 128-139, 10.3390/cosmetics1020128.
37. Freitas, J. V.; Lopes, N. P.; Gaspar, L. R., Photostability evaluation of five uv-filters, trans-resveratrol and beta-carotene in sunscreens. *Eur J Pharm Sci* **2015**, *78*, 79-89, 10.1016/j.ejps.2015.07.004.
38. Karpkird, T.; Khunsakorn, R.; Noptheeranuphap, C.; Midpanon, S., Inclusion complexes and photostability of uv filters and curcumin with beta-cyclodextrin polymers: Effect on cross-linkers. *J Incl Phenom Macrocyclic Chem* **2018**, *91*, 37-45, 10.1007/s10847-018-0796-y.

39. Paris, C.; Lhiaubet-Vallet, V.; Jimenez, O.; Trullas, C.; Miranda, M. A., A blocked diketo form of avobenzone: Photostability, photosensitizing properties and triplet quenching by a triazine-derived uvb-filter. *Photochem Photobiol* **2009**, *85*, 178-184, 10.1111/j.1751-1097.2008.00414.x.
40. Coelho, L.; Almeida, I. F.; Sousa Lobo, J. M.; Sousa, E. S. J. P., Photostabilization strategies of photosensitive drugs. *Int J Pharm* **2018**, *541*, 19-25, 10.1016/j.ijpharm.2018.02.012.
41. de Oliveira, C. A.; Dario, M. F.; Sarruf, F. D.; Mariz, I. F. A.; Velasco, M. V. R.; Rosado, C.; Baby, A. R., Safety and efficacy evaluation of gelatin-based nanoparticles associated with uv filters. *Colloids Surf B Biointerfaces* **2016**, *140*, 531-537, 10.1016/j.colsurfb.2015.11.031.
42. Graziola, F.; Candido, T. M.; De Oliveira, C. A.; Peres, D. D.; Issa, M. G.; Mota, J.; Rosado, C.; Consiglieri, V. O.; Kaneko, T. M.; Velasco, M. V. R., *et al.*, Gelatin-based microspheres crosslinked with glutaraldehyde and rutin oriented to cosmetics. *Bras J Pharm Sci* **2016**, *52*, 603-612, 10.1590/S1984-82502016000400004.
43. Oliveira, C. A. D.; Peres, D. D.; Graziola, F.; Chacra, N. A. B.; Araújo, G. L. B. D.; Flórido, A. C.; Mota, J.; Rosado, C.; Velasco, M. V. R.; Rodrigues, L. M., *et al.*, Cutaneous biocompatible rutin-loaded gelatin-based nanoparticles increase the spf of the association of uva and uvb filters. *Eur J Pharm Sci* **2016**, *81*, 1-9, 10.1016/j.ejps.2015.09.016.
44. Al-Rawashdeh, N. A. F.; Al-Sadeh, K. S.; Al-Bitar, M. B., Physicochemical study on microencapsulation of hydroxypropyl- $\beta$ -cyclodextrin in dermal preparations. *Drug Dev Ind Pharm* **2010**, *36*, 688-697, 10.3109/03639040903449738.
45. Scalia, S.; Casolari, A.; Iaconinoto, A.; Simeoni, S., Comparative studies of the influence of cyclodextrins on the stability of the sunscreen agent, 2-ethylhexyl-p-methoxycinnamate. *J Pharm Biomed Anal* **2002**, *30*, 1181-1189, 10.1016/S0731-7085(02)00433-8.
46. Scalia, S.; Tursilli, R.; Iannuccelli, V., Complexation of the sunscreen agent, 4-methylbenzylidene camphor with cyclodextrins: Effect on photostability and human stratum corneum penetration. *J Pharm Biomed Anal* **2007**, *44*, 29-34, 10.1016/j.jpba.2007.01.016.
47. Shokri, J.; Hasanzadeh, D.; Ghanbarzadeh, S.; Dizadji-Ilkhchi, M.; Adibkia, K., The effect of beta-cyclodextrin on percutaneous absorption of commonly used eusolex® sunscreens. *Drug Res* **2013**, *63*, 591-596, 10.1055/s-0033-1349089.
48. Gonzalez, H.; Tarras-Wahlberg, N.; Stromdahl, B.; Juzeniene, A.; Moan, J.; Larko, O.; Rosen, A.; Wennberg, A. M., Photostability of commercial sunscreens upon sun exposure and irradiation by ultraviolet lamps. *BMC Dermatol* **2007**, *7*, 1, 10.1186/1471-5945-7-1.
49. Shaath, N. A., Ultraviolet filters. *Photochem Photobiol Sci* **2010**, *9*, 464-469, 10.1039/b9pp00174c.
50. Huong, S. P.; Rocher, E. e.; Fourneron, J.-D.; Charles, L.; Monnier, V. e.; Bun, H.; Andrieu, V., Photoreactivity of the sunscreen butylmethoxydibenzoylmethane (dbm) under various experimental conditions. *J Photochem Photobiol A Chem* **2008**, *196*, 106-112, 10.1016/j.jphotochem.2007.11.023.
51. Juliano, C.; Magrini, G. A., Cosmetic ingredients as emerging pollutants of environmental and health concern. A mini-review. *Cosmetics* **2017**, *4*, 10.3390/cosmetics4020011.
52. Cunha, S. C.; Fernandes, J. O.; Vallecillos, L.; Cano-Sancho, G.; Domingo, J. L.; Pocurull, E.; Borrull, F.; Maulvault, A. L.; Ferrari, F.; Fernandez-Tejedor, M., *et al.*, Co-occurrence of musk fragrances and uv-filters in seafood and macroalgae collected in european hotspots. *Environ Res* **2015**, *143*, 65-71, 10.1016/j.envres.2015.05.003.
53. Gadelha, J. R.; Rocha, A. C.; Camacho, C.; Eljarrat, E.; Peris, A.; Aminot, Y.; Readman, J. W.; Boti, V.; Nannou, C.; Kapsi, M., *et al.*, Persistent and emerging pollutants assessment on aquaculture oysters (*crassostrea gigas*) from nw portuguese coast (ria de aveiro). *Sci Total Environ* **2019**, *666*, 731-742, 10.1016/j.scitotenv.2019.02.280.
54. Mitchelmore, C. L.; He, K.; Gonsior, M.; Hain, E.; Heyes, A.; Clark, C.; Younger, R.; Schmitt-Kopplin, P.; Feerick, A.; Conway, A., *et al.*, Occurrence and distribution of uv-filters and other anthropogenic contaminants in coastal surface water, sediment, and coral tissue from hawaii. *Sci Total Environ* **2019**, *670*, 398-410, 10.1016/j.scitotenv.2019.03.034.
55. Shick, J. M.; Lesser, M. P.; Jokiel, P. L., Effects of ultraviolet radiation on corals and other coral reef organisms. *Global Change Biol* **1996**, *2*, 527-545, 10.1111/j.1365-2486.1996.tb00065.x.

56. Wijgerde, T.; van Ballegooijen, M.; Nijland, R.; van der Loos, L.; Kwadijk, C.; Osinga, R.; Murk, A.; Slijkerman, D., Adding insult to injury: Effects of chronic oxybenzone exposure and elevated temperature on two reef-building corals. *Sci Total Environ* **2020**, 733, 10.1016/j.scitotenv.2020.139030.
57. Corinaldesi, C.; Marcellini, F.; Nepote, E.; Damiani, E.; Danovaro, R., Impact of inorganic uv filters contained in sunscreen products on tropical stony corals (acropora spp.). *Sci Total Environ* **2018**, 637–638, 1279–1285, 10.1016/j.scitotenv.2018.05.108.
58. Cahova, J.; Blahova, J.; Marsalek, P.; Doubkova, V.; Franc, A.; Garajová, M.; Tichy, F.; Mares, J.; Svobodova, Z., The biological activity of the organic uv filter ethylhexyl methoxycinnamate in rainbow trout (oncorhynchus mykiss). *Sci Total Environ* **2021**, 774, 10.1016/j.scitotenv.2021.145570.
59. Gago-Ferrero, P.; Díaz-Cruz, M. S.; Barceló, D., Uv filters bioaccumulation in fish from iberian river basins. *Sci. Total Environ.* **2015**, 518–519, 518–525, 10.1016/j.scitotenv.2015.03.026.
60. Balmer, M. E.; Buser, H. R.; Müller, M. D.; Poiger, T., Occurrence of some organic uv filters in wastewater, in surface waters, and in fish from swiss lakes. *Environ Sci Technol* **2005**, 39, 953–962, 10.1021/es040055r.
61. Gago-Ferrero, P.; Alonso, M. B.; Bertozzi, C. P.; Marigo, J.; Barbosa, L.; Cremer, M.; Secchi, E. R.; Azevedo, A.; Lailson-Brito Jr, J.; Torres, J. P. M., *et al.*, First determination of uv filters in marine mammals. Octocrylene levels in franciscana dolphins. *Environ Sci Technol* **2013**, 47, 5619–5625, 10.1021/es400675y.
62. Wawrzynczak, A.; Feliczak-Guzik, A.; Nowak, I., Nanosunscreens: From nanoencapsulated to nanosized cosmetic active forms. In *Nanobiomaterials in galenic formulations and cosmetics: Applications of nanobiomaterials*, Elsevier Inc.: 2016; pp 25–46.
63. Wang, S. Q.; Balagula, Y.; Osterwalder, U., Photoprotection: A review of the current and future technologies. *Dermatol Ther* **2010**, 23, 31–47.
64. Janjua, N. R.; Mogensen, B.; Andersson, A. M.; Petersen, J. H.; Henriksen, M.; Skakkebaek, N. E.; Wulf, H. C., Systemic absorption of the sunscreens benzophenone-3, octyl-methoxycinnamate, and 3-(4-methyl-benzylidene) camphor after whole-body topical application and reproductive hormone levels in humans. *J Invest Dermatol* **2004**, 123, 57–61, 10.1111/j.0022-202X.2004.22725.x.
65. Rodriguez, I.; Fenollosa, R., Meseguer, F. Silicon microspheres as uv, visible and infrared filters for cosmetics. <https://www.cosmeticsandtoiletries.com/formulating/function/uvfilter/premium-Silicon-Microspheres-as-UV-Visible-and-Infrared-Filters-for-Cosmetics-208701831.html> (12th July),
66. Ambroggi, V.; Latterini, L.; Marmottini, F.; Pagano, C.; Ricci, M., Mesoporous silicate mcm-41 as a particulate carrier for octyl methoxycinnamate: Sunscreen release and photostability. *J Pharm Sci* **2013**, 102, 1468–1475, 10.1002/jps.23478.
67. Revised guidance document 150 on standardised test guidelines for evaluating chemicals for endocrine disruption. Development, O.-O. f. E. C.-o. a., Ed. OECD Publishing, Paris: 2018.
68. Witorsch, R. J.; Thomas, J. A., Personal care products and endocrine disruption: A critical review of the literature. *Crit Rev Toxicol* **2010**, 40, 1–30, 10.3109/10408444.2010.515563.
69. Rehfeld, A.; Dissing, S.; Skakkebaek, N. E., Chemical uv filters mimic the effect of progesterone on ca<sup>2+</sup> signaling in human sperm cells. *Endocrinology* **2016**, 157, 4297–4308, 10.1210/en.2016-1473.
70. Ponzo, O. J.; Silvia, C., Evidence of reproductive disruption associated with neuroendocrine changes induced by uv-b filters, phtalates and nonylphenol during sexual maturation in rats of both gender. *Toxicology* **2013**, 311, 41–51, 10.1016/j.tox.2013.05.014.
71. Axelstad, M.; Boberg, J.; Hougaard, K. S.; Christiansen, S.; Jacobsen, P. R.; Mandrup, K. R.; Nellemann, C.; Lund, S. P.; Hass, U., Effects of pre- and postnatal exposure to the uv-filter octyl methoxycinnamate (omc) on the reproductive, auditory and neurological development of rat offspring. *Toxicol Appl Pharmacol* **2011**, 250, 278–290, 10.1016/j.taap.2010.10.031.
72. Ozáez, I.; Martínez-Guitarte, J. L.; Morcillo, G., Effects of in vivo exposure to uv filters (4-mbc, omc, bp-3, 4-hb, oc, od-paba) on endocrine signaling genes in the insect chironomus riparius. *Sci Total Environ* **2013**, 456–457, 120–126, 10.1016/j.scitotenv.2013.03.081.

73. Li, A. J.; Law, J. C. F.; Chow, C. H.; Huang, Y.; Li, K.; Leung, K. S. Y., Joint effects of multiple uv filters on zebrafish embryo development. *Environ Sci Technol* **2018**, *52*, 9460-9467, 10.1021/acs.est.8b02418.
74. Li, V. W. T.; Tsui, M. P. M.; Chen, X.; Hui, M. N. Y.; Jin, L.; Lam, R. H. W.; Yu, R. M. K.; Murphy, M. B.; Cheng, J.; Lam, P. K. S., *et al.*, Effects of 4-methylbenzylidene camphor (4-mbc) on neuronal and muscular development in zebrafish (*danio rerio*) embryos. *Environ Sci Pollut Res* **2016**, *23*, 8275-8285, 10.1007/s11356-016-6180-9.
75. Lorigo, M.; Mariana, M.; Cairrao, E., Photoprotection of ultraviolet-b filters: Updated review of endocrine disrupting properties. *Steroids* **2018**, *131*, 46-58, 10.1016/j.steroids.2018.01.006.
76. Balázs, A.; Krifaton, C.; Orosz, I.; Szoboszlai, S.; Kovács, R.; Csenki, Z.; Urbányi, B.; Kriszt, B., Hormonal activity, cytotoxicity and developmental toxicity of uv filters. *Ecotoxicol Environ Saf* **2016**, *131*, 45-53, 10.1016/j.ecoenv.2016.04.037.
77. Chen, T. H.; Hsieh, C. Y.; Ko, F. C.; Cheng, J. O., Effect of the uv-filter benzophenone-3 on intra-colonial social behaviors of the false clown anemonefish (*amphiprion ocellaris*). *Sci Total Environ* **2018**, *644*, 1625-1629, 10.1016/j.scitotenv.2018.07.203.
78. Carvalhais, A.; Pereira, B.; Sabato, M.; Seixas, R.; Dolbeth, M.; Marques, A.; Guilherme, S.; Pereira, P.; Pacheco, M.; Miei, C., Mild effects of sunscreen agents on a marine flatfish: Oxidative stress, energetic profiles, neurotoxicity and behaviour in response to titanium dioxide nanoparticles and oxybenzone. *Int J Mol Sci* **2021**, *22*, 1-25, 10.3390/ijms22041567.
79. Pablos, M. V.; Garcia-Hortiguera, P.; Fernandez, C., Acute and chronic toxicity of emerging contaminants, alone or in combination, in *chlorella vulgaris* and *daphnia magna*. *Environ Sci Pollut Res Int* **2015**, *22*, 5417-5424, 10.1007/s11356-015-4119-1.
80. Elder, D. P.; Snodin, D. J., Drug substances presented as sulfonic acid salts: Overview of utility, safety and regulation. *J Pharm Pharmacol* **2009**, *61*, 269-278, 10.1211/jpp/61.03.0001.
81. Lozano, C.; Matallana-Surget, S.; Givens, J.; Nouet, S.; Arbuckle, L.; Lambert, Z.; Lebaron, P., Toxicity of uv filters on marine bacteria: Combined effects with damaging solar radiation. *Sci Total Environ* **2020**, *722*, 10.1016/j.scitotenv.2020.137803.
82. Huang, Y.; Law, J. C. F.; Lam, T. K.; Leung, K. S. Y., Risks of organic uv filters: A review of environmental and human health concern studies. *Sci Total Environ* **2021**, *755*, 10.1016/j.scitotenv.2020.142486.
83. Pico, Y.; Belenguer, V.; Corcellas, C.; Diaz-Cruz, M. S.; Eljarrat, E.; Farre, M.; Gago-Ferrero, P.; Huerta, B.; Navarro-Ortega, A.; Petrovic, M., *et al.*, Contaminants of emerging concern in freshwater fish from four spanish rivers. *Sci Total Environ* **2019**, *659*, 1186-1198, 10.1016/j.scitotenv.2018.12.366.
84. Tsui, M. M. P.; Lam, J. C. W.; Ng, T. Y.; Ang, P. O.; Murphy, M. B.; Lam, P. K. S., Occurrence, distribution, and fate of organic uv filters in coral communities. *Environ Sci Technol* **2017**, *51*, 4182-4190, 10.1021/acs.est.6b05211.
85. The Senate, T.-n. L., State of Hawaii. [https://www.Capitol.Hawaii.Gov/session2018/bills/sb2571\\_.Htm](https://www.Capitol.Hawaii.Gov/session2018/bills/sb2571_.Htm). (29th April 2021),
86. Danovaro, R.; Bongiorno, L.; Corinaldesi, C.; Giovannelli, D.; Damiani, E.; Astolfi, P.; Greci, L.; Pusceddu, A., Sunscreens cause coral bleaching by promoting viral infections. *Environ Health Perspect* **2008**, *116*, 441-447, 10.1289/ehp.10966.
87. Picot Groz, M.; Martinez Bueno, M. J.; Rosain, D.; Fenet, H.; Casellas, C.; Pereira, C.; Maria, V.; Bebianno, M. J.; Gomez, E., Detection of emerging contaminants (uv filters, uv stabilizers and musks) in marine mussels from portuguese coast by quechers extraction and gc-ms/ms. *Sci Total Environ* **2014**, *493*, 162-169, 10.1016/j.scitotenv.2014.05.062.
88. Thorel, E.; Clergeaud, F.; Jaugeon, L.; Rodrigues, A. M. S.; Lucas, J.; Stien, D.; Lebaron, P., Effect of 10 uv filters on the brine shrimp *artemia salina* and the marine microalga *tetraselmis* sp. *Toxics* **2020**, *8*, 10.3390/TOXICS8020029.
89. Mao, F.; He, Y.; Gin, K. H., Evaluating the joint toxicity of two benzophenone-type uv filters on the green alga *chlamydomonas reinhardtii* with response surface methodology. *Toxics* **2018**, *6*, 10.3390/toxics6010008.
90. Boyd, A.; Stewart, C. B.; Philibert, D. A.; How, Z. T.; El-Din, M. G.; Tierney, K. B.; Blewett, T. A., A burning issue: The effect of organic ultraviolet filter exposure on the behaviour and physiology of *daphnia magna*. *Sci Total Environ* **2021**, *750*, 10.1016/j.scitotenv.2020.141707.
91. Quintaneiro, C.; Teixeira, B.; Benedé, J. L.; Chisvert, A.; Soares, A. M. V. M.; Monteiro, M. S., Toxicity effects of the organic uv-filter 4-methylbenzylidene camphor in zebrafish embryos. *Chemosphere* **2019**, *218*, 273-281, 10.1016/j.chemosphere.2018.11.096.



92. Pawlowski, S.; Herzog, B.; Sohn, M.; Petersen-Thiery, M.; Acker, S., Ecosun pass: A tool to evaluate the ecofriendliness of uv filters used in sunscreen products. *Int J Cosmet Sci* **2021**, *43*, 201-210, 10.1111/ics.12681.
93. Bordalo, D.; Leite, C.; Almeida, Â.; Soares, A. M. V. M.; Pretti, C.; Freitas, R., Impacts of uv filters in mytilus galloprovincialis: Preliminary data on the acute effects induced by environmentally relevant concentrations. *Sustainability* **2020**, *12*, 10.3390/SU12176852.
94. Krutmann, J.; Passeron, T.; Gilaberte, Y.; Granger, C.; Leone, G.; Narda, M.; Schalka, S.; Trullas, C.; Masson, P.; Lim, H. W., Photoprotection of the future: Challenges and opportunities. *J Eur Acad Dermatol Venereol* **2020**, *34*, 447-454, 10.1111/jdv.16030.
95. Yarovaya, L.; Waranuch, N.; Wisuitiprot, W.; Khunkitti, W., Effect of grape seed extract on skin fibroblasts exposed to uva light and its photostability in sunscreen formulation. *J Cosmet Dermatol* **2020**, 10.1111/jocd.13711.
96. Hubner, A.; Sobreira, F.; Neto, A. V.; de Oliveira Pinto, C. A. S.; Dario, M. F.; Díaz, I. E. C.; Lourenço, F. R.; Rosado, C.; Baby, A. R.; Bacchi, E. M., The synergistic behavior of antioxidant phenolic compounds obtained from winemaking waste's valorization, increased the efficacy of a sunscreen system. *Antioxidants* **2019**, *8*, 10.3390/antiox8110530.
97. da Silva, A. C. P.; Paiva, J. P.; Diniz, R. R.; dos Anjos, V. M.; Silva, A. B. S. M.; Pinto, A. V.; dos Santos, E. P.; Leitão, A. C.; Cabral, L. M.; Rodrigues, C. R., *et al.*, Photoprotection assessment of olive (*olea europaea* l.) leaves extract standardized to oleuropein: In vitro and in silico approach for improved sunscreens. *J Photochem Photobiol B Biol* **2019**, *193*, 162-171, 10.1016/j.jphotobiol.2019.03.003.
98. Polonini, H. C.; Brandão, M. A. F.; Raposo, N. R. B., A natural broad-spectrum sunscreen formulated from the dried extract of brazilian lippia sericea as a single uv filter. *RSC Adv* **2014**, *4*, 62566-62575, 10.1039/c4ra11577e.
99. Alves, G. D. A. D.; de Souza, R. O.; Rogez, H.; Masaki, H.; Fonseca, M. J. V., Cecropia obtusa, an amazonian ethanolic extract, exhibits photochemoprotective effect in vitro and balances the redox cellular state in response to uv radiation. *Ind Crops Prod* **2016**, *94*, 893-902, 10.1016/j.indcrop.2016.09.064.
100. Anurukvorakun, O.; Boonruang, R.; Lahpun, N., Formulation strategy, stability issues, safety and efficacy evaluations of acacia catechu whitening cream. *Int J Appl Pharm* **2019**, *11*, 91-96, 10.22159/ijap.2019v11i2.30632.
101. Wróblewska, K. B.; Baby, A. R.; Grombone Guaratini, M. T.; Moreno, P. R. H., In vitro antioxidant and photoprotective activity of five native brazilian bamboo species. *Ind Crops Prod* **2019**, *130*, 208-215, 10.1016/j.indcrop.2018.12.081.
102. Lohezic-Le Devehat, F.; Legouin, B.; Couteau, C.; Boustie, J.; Coiffard, L., Lichenic extracts and metabolites as uv filters. *J Photochem Photobiol B Biol* **2013**, *120*, 17-28, 10.1016/j.jphotobiol.2013.01.009.
103. Lee, S. C.; Lee, S. H.; Won, K., Wood powder as a new natural sunscreen ingredient. *Biotechnol. Bioprocess Eng.* **2019**, *24*, 258-263, 10.1007/s12257-018-0397-z.
104. Rasheed, A.; Shama, S. N.; Mohanalakshmi, S.; Ravichandran, V., Formulation, characterization and in vitro evaluation of herbal sunscreen lotion. *Orient Pharm Exp Med* **2012**, *12*, 241-246, 10.1007/s13596-012-0069-z.
105. Widiyati, E. In *Determination of ultraviolet filter activity on coconut oil cosmetic cream*, Suyanto, S.; Kusumawardani, C.; Wilujeng, I.; Abadi, A. M., Eds. American Institute of Physics Inc.: 2017.
106. Bhattacharya, S.; Sherje, A. P., Development of resveratrol and green tea sunscreen formulation for combined photoprotective and antioxidant properties. *J Drug Deliv Sci Technol* **2020**, *60*, 10.1016/j.jddst.2020.102000.
107. L'Alloret, F.; Candau, D.; Seité, S.; Pygmalion, M. J.; Ruiz, L.; Josso, M.; Meaudre, H.; Gauchet, L.; Pena, A. M.; Colonna, A., New combination of ultraviolet absorbers in an oily emollient increases sunscreen efficacy and photostability. *Dermatol Ther* **2012**, *2*, 1-10, 10.1007/s13555-012-0004-8.
108. Montenegro, L.; Santagati, L. M., Use of vegetable oils to improve the sun protection factor of sunscreen formulations. *Cosmetics* **2019**, *6*, 10.3390/COSMETICS6020025.

109. Mota, M. D.; Costa, R. Y. S.; Guedes, A. A. S.; Silva, L. C. R. C. E.; Chinalia, F. A., Guava-fruit extract can improve the uv-protection efficiency of synthetic filters in sun cream formulations. *J Photochem Photobiol B Biol* **2019**, *201*, 10.1016/j.jphotobiol.2019.111639.
110. Milani, L. P. G.; Garcia, N. O. S.; Morais, M. C.; Dias, A. L. S.; Oliveira, N. L.; Conceição, E. C., Extract from byproduct psidium guajava standardized in ellagic acid: Additivation of the in vitro photoprotective efficacy of a cosmetic formulation. *Rev Bras Farmacogn* **2018**, *28*, 692-696, 10.1016/j.bjp.2018.08.005.
111. Niculae, G.; Lacatusu, I.; Badea, N.; Stan, R.; Vasile, B. S.; Meghea, A., Rice bran and raspberry seed oil-based nanocarriers with self-antioxidative properties as safe photoprotective formulations. *Photochem Photobiol Sci* **2014**, *13*, 703-716, 10.1039/c3pp50290b.
112. Almeida, W. A. D. S.; Antunes, A. D. S.; Penido, R. G.; Correa, H. S. D. G.; Nascimento, A. M. D.; Andrade, Â. L.; Santos, V. R.; Cazati, T.; Amparo, T. R.; Souza, G. H. B. D., *et al.*, Photoprotective activity and increase of spf in sunscreen formulation using lyophilized red propolis extracts from alagoas. *Rev Bras Farmacogn* **2019**, *29*, 373-380, 10.1016/j.bjp.2019.02.003.
113. Llewellyn, C. A.; Airs, R. L., Distribution and abundance of maas in 33 species of microalgae across 13 classes. *Mar Drugs* **2010**, *8*, 1273-1291, 10.3390/md8041273.
114. Liu, Z., Occurrence of mycosporine-like amino acids (maas) in the bloom-forming cyanobacterium microcystis aeruginosa. *J Plankton Res* **2004**, *26*, 963-966, 10.1093/plankt/fbh083.
115. Rangel, K. C.; Villela, L. Z.; Pereira, K. D. C.; Colepicolo, P.; Deboni, H. M.; Gaspar, L. R., Assessment of the photoprotective potential and toxicity of antarctic red macroalgae extracts from curdiea racovitzae and iridaea cordata for cosmetic use. *Algal Res* **2020**, *50*, 10.1016/j.algal.2020.101984.
116. Prasedya, E. S.; Syafitri, S. M.; Geraldine, B. A. F. D.; Hamdin, C. D.; Frediansyah, A.; Miyake, M.; Kobayashi, D.; Hazama, A.; Sunarpi, H., Uva photoprotective activity of brown macroalgae sargassum cristafolium. *Biomedicines* **2019**, *7*, 10.3390/biomedicines7040077.
117. Proteau, P. J.; Gerwick, W. H.; Garcia-Pichel, F.; Castenholz, R., The structure of scytonemin, an ultraviolet sunscreen pigment from the sheaths of cyanobacteria. *Experientia* **1993**, *49*, 825-829.
118. Kang, M. R.; Jo, S. A.; Lee, H.; Yoon, Y. D.; Kwon, J. H.; Yang, J. W.; Choi, B. J.; Park, K. H.; Lee, M. Y.; Lee, C. W., *et al.*, Inhibition of skin inflammation by scytonemin, an ultraviolet sunscreen pigment. *Mar Drugs* **2020**, *18*, 10.3390/md18060300.
119. Teixeira, T. R.; Rangel, K. C.; Tavares, R. S. N.; Kawakami, C. M.; Dos Santos, G. S.; Maria-Engler, S. S.; Colepicolo, P.; Gaspar, L. R.; Deboni, H. M., In vitro evaluation of the photoprotective potential of quinolinic alkaloids isolated from the antarctic marine fungus penicillium echinulatum for topical use. *Marine Biotechnol (NY)* **2021**, 10.1007/s10126-021-10030-x.
120. Maciel, O. M. C.; Tavares, R. S. N.; Caluz, D. R. E.; Gaspar, L. R.; Deboni, H. M., Photoprotective potential of metabolites isolated from algae-associated fungi annulohypoxylon stygium. *J Photochem Photobiol B Biol* **2018**, *178*, 316-322, 10.1016/j.jphotobiol.2017.11.018.
121. Regalado, E. L.; Rodriguez, M.; Menendez, R.; Concepcion, A. A.; Nogueiras, C.; Laguna, A.; Rodriguez, A. A.; Williams, D. E.; Lorenzo-Luaces, P.; Valdes, O., *et al.*, Repair of uvb-damaged skin by the antioxidant sulphated flavone glycoside thalassiolin b isolated from the marine plant thalassia testudinum banks ex konig. *Marine Biotechnol (NY)* **2009**, *11*, 74-80, 10.1007/s10126-008-9123-8.
122. Ahmed, F. E., Setlow, R. B., Ultraviolet radiation-induced DNA damage and its photorepair in the skin of the platyfish xiphophorus. *Cancer Res* **1993**, *53*, 2249-2255.
123. Ryu, B.; Qian, Z.-J.; Kim, M.-M.; Nam, K. W.; Kim, S.-K., Anti-photoaging activity and inhibition of matrix metalloproteinase (mmp) by marine red alga, corallina pilulifera methanol extract. *Radiat Phys Chem* **2009**, *78*, 98-105, 10.1016/j.radphyschem.2008.09.001.
124. Yabe, S.; Sato, T., Cerium oxide for sunscreen cosmetics. *J Solid State Chem* **2003**, *171*, 7-11, 10.1016/S0022-4596(02)00139-1.

125. Seixas, V. C.; Serra, O. A., Stability of sunscreens containing cepo4: Proposal for a new inorganic uv filter. *Molecules* **2014**, *19*, 9907-9925, 10.3390/molecules19079907.
126. Polonini, H. C.; Lopes, R. S.; Beatriz, A.; Gomes, R. S.; Silva, A. O.; De Lima, R. V.; Nunes, G. A.; Brandão, M. A. F.; Raposo, N. R. B.; De Lima, D. P., Synthesis and evaluation of octocrylene-inspired compounds for uv-filter activity. *Quim Nova* **2014**, *37*, 1004-1009, 10.5935/0100-4042.20140160.
127. González, M. T. P.; Fumagalli, F.; Benevenuto, C. G.; da Silva Emery, F.; Gaspar, L. R., Novel benzophenone-3 derivatives with promising potential as uv filters: Relationship between structure, photoprotective potential and phototoxicity. *Eur J Pharm Sci* **2017**, *101*, 200-210, 10.1016/j.ejps.2017.02.014.
128. Gonçalves, M. C.; Rossoni, J. V., Jr.; Rabelo, A. C. S.; Costa, D. C.; Cazati, T.; Taylor, J. G.; Dos Santos, V. M. R., Preliminary studies of the cytotoxicity and photoprotective properties of benzophenone and lactone derivatives. *Rev. Virtual Quim* **2018**, *10*, 600-608, 10.21577/1984-6835.20180044.
129. Abbas, N.; Mahmood, Z.; Manzoor, S.; Akhtar, Z.; Tariq, M., Synthesis, characterization and sunscreen protection factor of novel synthesized para amino benzoic acid (paba) esters. *J Chem Soc Pak* **2019**, *41*, 701-706.
130. Bino, A.; Baldisserotto, A.; Scalambra, E.; Dissette, V.; Vedaldi, D. E.; Salvador, A.; Durini, E.; Manfredini, S.; Vertuani, S., Design, synthesis and biological evaluation of novel hydroxy-phenyl-1h-benzimidazoles as radical scavengers and uv-protective agents. *J Enzyme Inhib Med Chem* **2017**, *32*, 527-537, 10.1080/14756366.2016.1265523.
131. Djuidje, E. N.; Durini, E.; Sciabica, S.; Serra, E.; Balzarini, J.; Liekens, S.; Manfredini, S.; Vertuani, S.; Baldisserotto, A., Skin damages—structure activity relationship of benzimidazole derivatives bearing a 5-membered ring system. *Molecules* **2020**, *25*, 10.3390/molecules25184324.
132. Popiół, J.; Gunia-Krzyzak, A.; Piska, K.; Zelaszczyk, D.; Koczurkiewicz, P.; Słoczynska, K.; Wójcik-Pszczola, K.; Krupa, A.; Kryczyk-Poprawa, A.; Zesławska, E., *et al.*, Discovery of novel uv-filters with favorable safety profiles in the 5-arylideneimidazolidine-2,4-dione derivatives group. *Molecules* **2019**, *24*, 10.3390/molecules24122321.
133. Peyrot, C.; Mention, M. M.; Brunissen, F.; Allais, F., Sinapic acid esters: Octinoxate substitutes combining suitable uv protection and antioxidant activity. *Antioxidants* **2020**, *9*, 1-16, 10.3390/antiox9090782.
134. Reis, J. S.; Corrêa, M. A.; Chung, M. C.; Dos Santos, J. L., Synthesis, antioxidant and photoprotection activities of hybrid derivatives useful to prevent skin cancer. *Bioorg Med Chem* **2014**, *22*, 2733-2738, 10.1016/j.bmc.2014.03.017.
135. Polonini, H. C.; Lima, L. L.; Gonçalves, K. M.; Do Carmo, A. M. R.; Da Silva, A. D.; Raposo, N. R. B., Photoprotective activity of resveratrol analogues. *Bioorg Med Chem* **2013**, *21*, 964-968, 10.1016/j.bmc.2012.11.052.
136. Horbury, M. D.; Holt, E. L.; Mouterde, L. M. M.; Balaguer, P.; Cebrian, J.; Blasco, L.; Allais, F.; Stavros, V. G., Towards symmetry driven and nature inspired uv filter design. *Nat Commun* **2019**, *10*, 4748, 10.1038/s41467-019-12719-z.
137. Rioux, B.; Peyrot, C.; Mention, M. M.; Brunissen, F.; Allais, F., Sustainable synthesis of p-hydroxycinnamic diacids through proline-mediated knoevenagel condensation in ethanol: An access to potent phenolic uv filters and radical scavengers. *Antioxidants* **2020**, *9*, 10.3390/antiox9040331.
138. Resende, D. I. S. P.; Almeida, M. C.; Maciel, B.; Carmo, H.; Lobo, J. S.; Pozzo, C. D.; Cravo, S. M.; Rosa, G. P.; Kane-Pagès, A.; Do Carmo Barreto, M., *et al.*, Efficacy, stability, and safety evaluation of new polyphenolic xanthenes towards identification of bioactive compounds to fight skin photoaging. *Molecules* **2020**, *25*, 10.3390/molecules25122782.
139. Polonini, H. C.; Dias, R. M. P.; Souza, I. O.; Gonçalves, K. M.; Gomes, T. B. B.; Raposo, N. R. B.; Da Silva, A. D., Quinolines derivatives as novel sunscreens agents. *Bioorg Med Chem Lett* **2013**, *23*, 4506-4510, 10.1016/j.bmcl.2013.06.046.
140. Giacomo, B.; Luca, B.; Nicola, L.; Luigi, R., Development of an innovative and eco-friendly uv radiation absorber, based on furan moieties. *Cosmetics* **2020**, *7*, 10.3390/cosmetics7010006.
141. Peyrot, C.; Mention, M. M.; Brunissen, F.; Balaguer, P.; Allais, F., Innovative bio-based organic uv-a and blue light filters from meldrum's acid. *Molecules* **2020**, *25*, 10.3390/molecules25092178.
